# Supplementary material for: Acquisition of Dynamic Function in Human Stem Cell-Derived β Cells
Source: PubMed Central journal article supplement — Stem Cell Reports. 2019 Jan 17;12(2):351–65. doi: 10.1016/j.stemcr.2018.12.012 (PMC6372986; doi:10.1016/j.stemcr.2018.12.012), 2019-01-17
Supplement: mmc2.pdf [file mmc2.pdf]

Acquisition of Dynamic Function in Human Stem Cell-Derived  $\beta$  CellsLeonardo Velazco-Cruz,<sup>1</sup> Jiwon Song,<sup>1</sup> Kristina G. Maxwell,<sup>1,2</sup> Madeleine M. Goedegebuure,<sup>1</sup> Punn Augsornworawat,<sup>1,2</sup> Nathaniel J. Hogrebe,<sup>1</sup> and Jeffrey R. Millman<sup>1,2,\*</sup><sup>1</sup>Division of Endocrinology, Metabolism and Lipid Research, Washington University School of Medicine, Campus Box 8127, 660 South Euclid Avenue, St. Louis, MO 63110, USA<sup>2</sup>Department of Biomedical Engineering, Washington University in St. Louis, 1 Brookings Drive, St. Louis, MO 63130, USA\*Correspondence: [jmillman@wustl.edu](mailto:jmillman@wustl.edu)<https://doi.org/10.1016/j.stemcr.2018.12.012>

## SUMMARY

Recent advances in human pluripotent stem cell (hPSC) differentiation protocols have generated insulin-producing cells resembling pancreatic  $\beta$  cells. While these stem cell-derived  $\beta$  (SC- $\beta$ ) cells are capable of undergoing glucose-stimulated insulin secretion (GSIS), insulin secretion per cell remains low compared with islets and cells lack dynamic insulin release. Herein, we report a differentiation strategy focused on modulating transforming growth factor  $\beta$  (TGF- $\beta$ ) signaling, controlling cellular cluster size, and using an enriched serum-free media to generate SC- $\beta$  cells that express  $\beta$  cell markers and undergo GSIS with first- and second-phase dynamic insulin secretion. Transplantation of these cells into mice greatly improves glucose tolerance. These results reveal that specific time frames for inhibiting and permitting TGF- $\beta$  signaling are required during SC- $\beta$  cell differentiation to achieve dynamic function. The capacity of these cells to undergo GSIS with dynamic insulin release makes them a promising cell source for diabetes cellular therapy.

## INTRODUCTION

Diabetes mellitus is a global health problem affecting over 400 million people worldwide and is increasing in prevalence (Mathers and Loncar, 2006; Stokes and Preston, 2017). Diabetes is principally caused by the death or dysfunction of insulin-producing  $\beta$  cells found within the islets of Langerhans in the pancreas, resulting in improper insulin secretion and failure of patients to maintain normal glycemia, which in severe cases can cause ketoacidosis and death. Patients are often reliant on insulin injections but can still suffer from long-term complications, including retinopathy, neuropathy, nephropathy, and cardiovascular disease (Nathan, 1993). An alternative treatment is replacement of the endogenous  $\beta$  cells by transplantation of pancreatic islets (Bellin et al., 2012; Hering et al., 2016; Lacy and Kostianovsky, 1967; Scharp et al., 1990; Shapiro et al., 2000). While this therapy has had clinical success, limited availability of cadaveric donor islets largely hampers its widespread application (Bonner-Weir and Weir, 2005).

Differentiation of human pluripotent stem cells (hPSCs) into stem cell-derived  $\beta$  cells (SC- $\beta$  cells) is a promising alternative cell source for diabetes cell replacement therapy as well as other applications, such as modeling disease and studying pancreatic development (Millman and Pagliuca, 2017). Through modulation of pathways identified from embryonic development, studies with hPSCs have detailed protocols for generating cells that resemble early endoderm and pancreatic progenitors (D'Amour et al., 2006; D'Amour et al., 2005; Kroon et al., 2008; Nostro et al., 2015; Reznia et al., 2012), the latter of which can be transplanted into rodents and spontaneously differentiated into  $\beta$ -like cells

after several months (Bruin et al., 2015; Kroon et al., 2008; Millman et al., 2016; Reznia et al., 2012).

We (Pagliuca et al., 2014) and others (Reznia et al., 2014) published similar approaches for generating SC- $\beta$  cells *in vitro* that in part use the compound Alk5 inhibitor type II (Alk5i) to inhibit transforming growth factor  $\beta$  (TGF- $\beta$ ) signaling during the last stages of differentiation. These approaches produced SC- $\beta$  cells capable of undergoing glucose-stimulated insulin secretion (GSIS) in static incubations, expressing  $\beta$  cell markers, and controlling blood sugar in diabetic mice after several weeks. However, even with this significant breakthrough, these cells had inferior function compared with human islets, including lower insulin secretion and little to no first- and second-phase insulin release in response to a high glucose challenge, demonstrating that these SC- $\beta$  cells were less mature than  $\beta$  cells from islets. Several follow-up studies have been performed introducing additional differentiation factors or optimizing the process but have failed to bring SC- $\beta$  cell function equivalent to human islets (Ghazizadeh et al., 2017; Millman et al., 2016; Russ et al., 2015; Zhu et al., 2016).

Here we report a six-stage differentiation strategy that generates almost pure populations of endocrine cells containing  $\beta$ -like cells that secrete high levels of insulin and express  $\beta$  cell markers. This is achieved by modulating Alk5i exposure to inhibit and permit TGF- $\beta$  signaling during key stages in combination with cellular cluster resizing and enriched serum-free media (ESFM) culture. These cells are glucose responsive, exhibiting first- and second-phase insulin release, and respond to multiple secretagogues. Transplanted cells greatly improve glucose tolerance in mice. We identify that inhibiting TGF- $\beta$  signaling during stage 6 greatly reduces the function of these differentiated

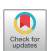

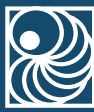

cells while treatment with Alk5i during stage 5 is necessary for a robust  $\beta$ -like cell phenotype.

## RESULTS

### Differentiation to Glucose-Responsive SC- $\beta$ Cells

#### *In Vitro*

We set out to develop an improved differentiation protocol starting from the approach we described in [Pagliuca et al. \(2014\)](#) using the HUES8 cell line. We included Y27632 during stages 3 to 4 and activin A during stage 4 as we reported previously ([Millman et al., 2016](#)) to help maintain cluster integrity and shortened stage 3 from 2 days to only 1 day to enhance progenitors ([Nostro et al., 2015](#)). We also developed an ESFM for stage 6 to replace the serum-containing media used previously to have a serum-free protocol. During our protocol pilot studies, we observed that both resizing clusters and removal of Alk5i and T3 increased insulin secretion while maintaining the C-peptide+ population ([Figures S1A and S1B](#)).

Combining these modifications resulted in our six-stage differentiation protocol outlined in [Figure 1A](#). Stage 6 cells are grown as clusters in suspension culture ([Figure 1B](#)) that averaged  $172 \pm 34 \mu\text{m}$  (mean  $\pm$  SD;  $n = 353$  individual clusters) in diameter, less than half the diameter of the clusters before resizing, which was  $364 \pm 55 \mu\text{m}$  ( $n = 155$  individual clusters). Stage 6 clusters stained red for the zinc-chelating dye dithizone, which stains  $\beta$  cells. Immunostaining of sectioned clusters revealed most cells to be C-peptide+, a protein also produced by the INS gene, in addition to PDX1+ and NKX6-1+,  $\beta$  cell markers ([Figure 1C](#)). A subset of cells stained positive for GCG or were polyhormonal, staining positive for both C-peptide and GCG. These polyhormonal cells are known to not to resemble adult  $\beta$  cells and are not functional ([D'Amour et al., 2006](#); [Hrvatini et al., 2014](#)).

We tested function of stage 6 cells generated with our differentiation protocol using both static ([Figures 1D, 1E, and S1C](#)) and dynamic GSIS assays ([Figures 1F and S1D](#)) and found that not only do the cells secrete insulin but also increase insulin release when moved from low to high glucose. With static GSIS, while there was some variability, stage 6 cells increased insulin secretion on average by a factor of  $3.0 \pm 0.1$  when moved from 2 to 20 mM glucose. This is an improvement compared with cells generated with the protocol described in [Pagliuca et al. \(2014\)](#) ( $1.4 \pm 0.1$ ), referred to here as the Pagliuca protocol, but less than human islets ( $3.2 \pm 0.1$ ) on average ([Figure 1D](#)). Stage 6 cells from this study did not increase insulin secretion in response to 5.6 mM glucose but did increase secretion in response to higher concentrations (11.1 and 20 mM), indicating that the cells are only stimulated at higher glucose

threshold ([Figure 1E](#)). In terms of insulin secretion per cell, stage 6 cells secreted on average  $5.3 \pm 0.5 \mu\text{IU}/10^3$  cells at 20 mM glucose,  $9.2 \pm 1.1$  times more than cells generated with the Pagliuca protocol and  $2.3 \pm 0.3$  times less than human islets, on average ([Figure 1D](#)). It is important to note that our insulin values with the Pagliuca protocol are within range of the 2014 report but were lower on average, with differentiated HUES8 reported to secrete  $0.2\text{--}2.6 \mu\text{IU}/10^3$  cells (average 1.4) and increase secretion by  $0.4\text{--}4.1$  (average 1.7) to high glucose.

With dynamic GSIS, stage 6 cells displayed a rapid first-phase insulin release within 3–5 min of high glucose exposure, increasing insulin secretion by a factor of  $7.6 \pm 1.3$  to  $159 \pm 21 \mu\text{IU}/\mu\text{g DNA}$ , higher than stage 6 cells generated from the Pagliuca protocol ( $1.7 \pm 0.2\times$  increase to  $11 \pm 1 \mu\text{IU}/\mu\text{g DNA}$ ) but lower than human islets ( $15.0 \pm 2.4\times$  increase to  $245 \pm 26 \mu\text{IU}/\mu\text{g DNA}$ ) ([Figure 1F](#)). Second-phase insulin secretion was observed with continued high glucose exposure, with cells maintaining  $2.1 \pm 0.3$  higher insulin secretion than the initial low glucose, a higher increase than with the Pagliuca protocol ( $0.9 \pm 0.1$ ) but lower than human islets ( $6.7 \pm 0.8$ ) ([Figure 1F](#)). When the cells were returned to low glucose, insulin secretion from stage 6 cells returned to a reduced rate. Elevating insulin secretion and displaying first- and second-phase insulin release to a high glucose challenge are key features of  $\beta$  cell behavior. Overall, stage 6 cells generated with this differentiation strategy produces cells with clear first- and second-phase insulin secretion, which was not demonstrated by [Pagliuca et al. \(2014\)](#) and [Rezania et al. \(2014\)](#) and not seen with stage 6 cells produced with the Pagliuca protocol. However, when compared with human islets containing  $\beta$  cells, these stage 6 cells still have lower insulin secretion per cell at high glucose, lower glucose stimulation on average, and slightly slower first-phase insulin release.

To further characterize stage 6 cells generated with our differentiation protocol, we immunostained cells with a panel of pancreatic islet markers ([Figures 2A–2C and S2](#)). The vast majority of cells expressed CHGA ( $96\% \pm 1\%$ ), a pan-endocrine marker, and most cells expressed C-peptide ( $73\% \pm 3\%$ ) ([Figure 2](#)). These fractions are higher than in stage 6 cells generated with the Pagliuca protocol ([Figure S2](#)) and reported in [Pagliuca et al. \(2014\)](#). Many C-peptide+ cells from both protocols expressed other markers found in  $\beta$  cells and expression of the other pancreatic hormones was observed ([Figures 2 and S2](#)). The majority of C-peptide+ cells expressed NKX6-1 ([Figure 2](#)) and were monohormonal, which we presumed to be the SC- $\beta$  cell population as done previously ([Pagliuca et al., 2014](#)). The fraction of C-peptide+ cells not expressing another hormone was increased compared with stage 6 cells generated with the Pagliuca protocol and reported in [Pagliuca et al. \(2014\)](#), while the fraction of these cells expressing another

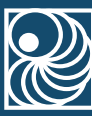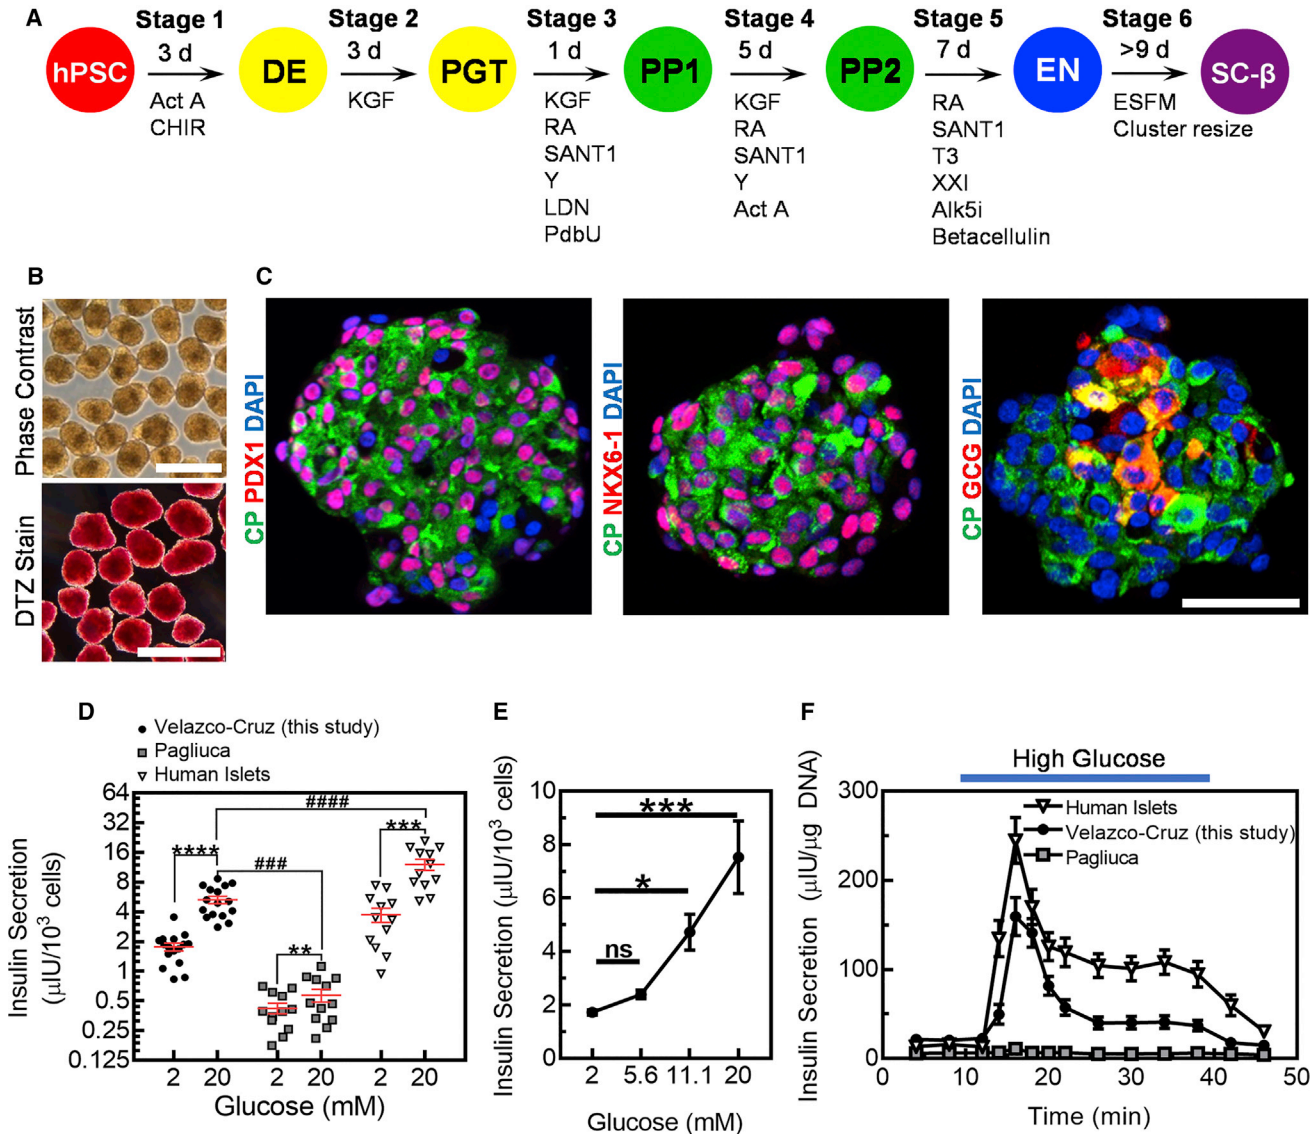

**Figure 1. SC- $\beta$  Cell Clusters undergo GSIS**

(A) Overview of our differentiation procedure.

(B) Images of unstained whole stage 6 clusters under phase contrast (top) or stained with dithizone (DTZ) (bottom) imaged under bright field. Scale bars, 400  $\mu\text{m}$ .

(C) Immunostaining of sectioned stage 6 clusters stained for glucagon (GCG), NKX6-1, PDX1, C-peptide (CP), or with the nuclei marker DAPI. Scale bar, 100  $\mu\text{m}$ .

(D) Human insulin secretion of stage 6 cells generated with the protocol from this study ( $n = 16$ ), stage 6 cells generated with the Pagliuca protocol ( $n = 12$ ), and cadaveric human islets ( $n = 12$ ) in a static GSIS assay.  $**p < 0.01$ ,  $****p < 0.0001$  by one-sided paired t test.  $###p < 0.001$ ,  $####p < 0.0001$  by one-way ANOVA Dunnett multiple comparison test compared with this study.

(E) Static GSIS assay of stage 6 cells from this study subjected to either 2, 5.6, 11.1, or 20 mM glucose ( $n = 4$ ).  $*p < 0.05$ ,  $***p < 0.001$ , n.s., not significant by one-way ANOVA Dunnett multiple comparison test compared with 2 mM glucose.

(F) Dynamic human insulin secretion of stage 6 cells generated with the protocol from this study ( $n = 12$ ), stage 6 cells generated with the Pagliuca protocol ( $n = 4$ ), and cadaveric human islets ( $n = 12$ ) in a perfusion GSIS assay. Cells are perfused with low glucose (2 mM) except where high glucose (20 mM) is indicated. Act A, activin A; CHIR, CHIR9901; KGF, keratinocyte growth factor; RA, retinoic acid; Y, Y27632; LDN, LDN193189; PdbU, phorbol 12,13-dibutyrate; T3, triiodothyronine; Alk5i, Alk5 inhibitor type II; ESFM, enriched serum-free medium. All stage 6 data shown are with HUES8.

Data are shown as means  $\pm$  SEM.



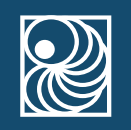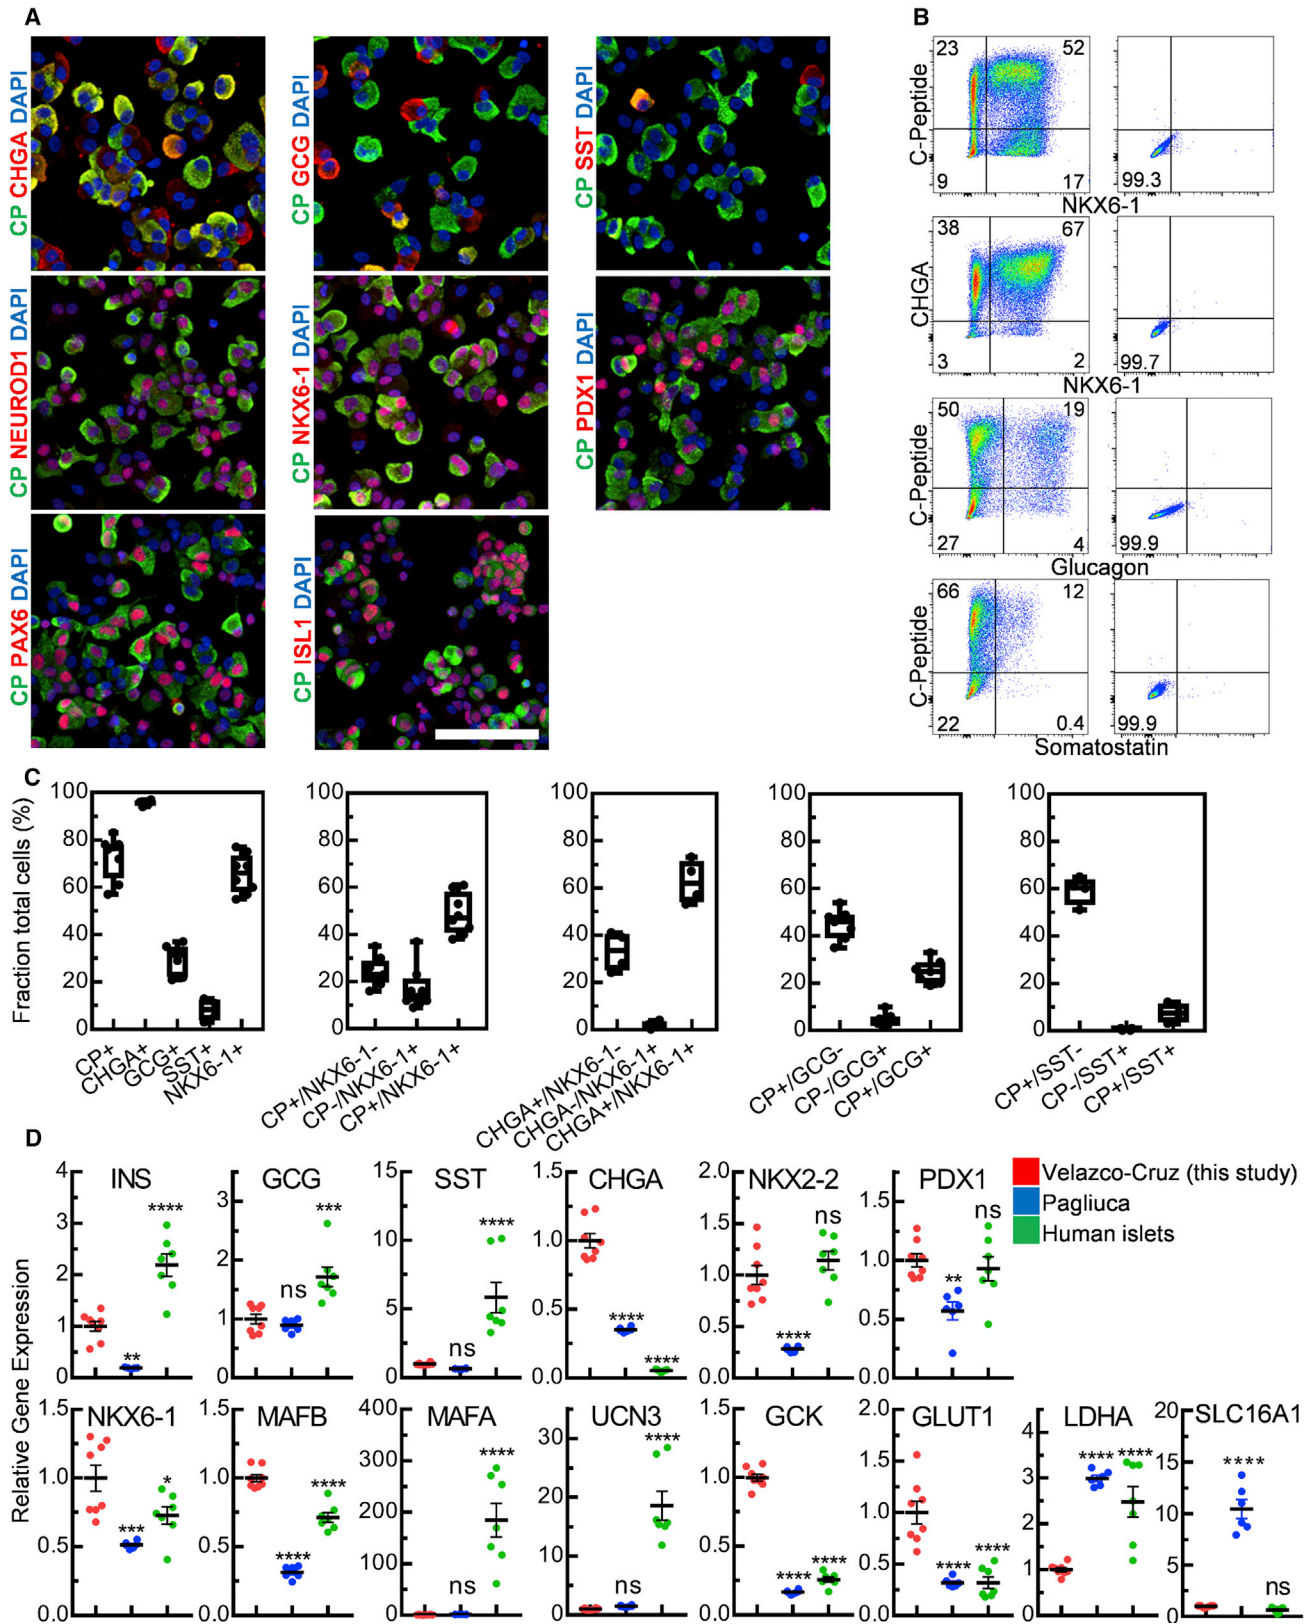

(legend on next page)

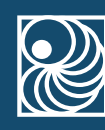

hormone was comparable (Figures 2 and S2). These data show that stage 6 cells generated with our differentiation strategy are predominantly pancreatic endocrine with the majority expressing C-peptide.

We measured expression of several genes compared with stage 6 cells generated with the Pagliuca protocol and human islets (Figures 2D and S3). Many islet and  $\beta$  cell genes were increased compared with the Pagliuca protocol, including INS, CHGA, NKX2-2, PDX1, NKX6-1, MAFB, GCK, and GLUT1. Interestingly, LDHA and SLC16A1, disallowed  $\beta$  cell genes, had reduced expression in our stage 6 cells compared with both the Pagliuca protocol and human islets (LDHA) and the Pagliuca protocol (SLC16A1). Our stage 6 cells had increased expression of CHGA, NKX6-1, MAFB, GCK, and GLUT1 compared with human islets. However, INS, GCG, SST, and particularly MAFA and UCN3 had reduced expression compared with stage 6 cells. However, several recent reports have provided evidence that question the utility of MAFA and UCN3 in evaluating human SC- $\beta$  cell maturation. MAFA expression is low in juvenile human  $\beta$  cells (Arda et al., 2016). MAFB is expressed in human but not mouse  $\beta$  cells (Arda et al., 2016; Tritschler et al., 2017; Xin et al., 2016). UCN3 expression is much higher in mouse than human  $\beta$  cells (Xin et al., 2016) and is also expressed by human  $\alpha$  cells (Baron et al., 2016; Tritschler et al., 2017). These data show that our stage 6 cells have improved gene expression for many markers compared with the Pagliuca protocol and, while the expression of several  $\beta$  cell markers are equal to or greater than human islets, other markers remain low.

### Transplantation of SC- $\beta$ Cells into Glucose-Intolerant Mice

To evaluate the functional potential of stage 6 cells *in vivo*, we first transplanted cells under the renal capsule of non-diabetic mice and evaluated the ability of the graft to respond to a glucose challenge (Figure 3A). We observed that, even after extended time post-transplantation (6 months), the grafts responded to a glucose injection by increasing human insulin by a factor of  $1.9 \pm 0.5$ . Excision and immunostaining of the transplanted kidneys revealed C-peptide+ cells that tended to be clustered together in addition to other pancreatic endocrine and exocrine

markers (Figures 3B and S4A). To more rigorously evaluate stage 6 cells *in vivo*, we transplanted a separate mouse cohort that had been chemically induced to be diabetic with streptozotocin (STZ) and evaluated function at early (10 and 16 day) and late (10 week) time points. After only 10 days post-transplantation, STZ-treated mice receiving stage 6 cells had greatly improved glucose tolerance compared with STZ-treated sham mice and had similar glucose clearance as the non-STZ-treated mice (Figures 3C and 3D). Measurements of human insulin 16 days after transplantation revealed high insulin concentrations that increased by a factor of  $2.3 \pm 0.6$  with a glucose injection to  $16.6 \pm 3.1$   $\mu$ IU/mL (Figure 3E). These values are greater than what was reported in Pagliuca et al. (2014) under similar conditions, which had an insulin increase of  $1.4 \pm 0.3$  and concentration of  $3.8 \pm 0.8$   $\mu$ IU/mL. Observing our cohort 10 weeks after transplantation revealed similar results as the 10- and 16-day data, with transplanted mice having greatly improved glucose tolerance (Figures 3F and 3G) and glucose-responsive insulin secretion (Figure 3H). Mice not receiving STZ had similar glucose tolerance as mice receiving a therapeutic dose of human islets (Pagliuca et al., 2014). Mice that did not receive stage 6 cells had undetectable human insulin and mice that received STZ had drastically reduced mouse C-peptide compared with non-STZ-treated mice (Figures S4B and S4C). Grafts from these STZ-treated mice contained cells that expressed  $\beta$  cell markers in addition to other endocrine and exocrine markers (Figure S4D). Overall these data demonstrate that stage 6 cells generated with our protocol are functional both at early and late time points *in vivo*, greatly improving glucose tolerance to equal that of non-STZ-treated mice.

### Characterization of SC- $\beta$ Cell Dynamic Function

Since the differentiation protocol produces cells that are capable of dynamic insulin secretion, we studied this phenotype in more detail. We performed dynamic GSIS on cells as they progressed through stage 6 (Figure 4A). We observed that robust dynamic function was transient, with cells at 5 days secreting low amounts of insulin and exhibiting weak first- and second-phase response, with later time points (9–26 days) secreting higher amounts of insulin with a clear first- and second-phase response.

### Figure 2. SC- $\beta$ Cells Express $\beta$ Cell and Islet Markers

(A) Immunostaining of dispersed stage 6 clusters plated overnight and stained for chromogranin A (CHGA), GCG, somatostatin (SST), NEUROD1, NKX6-1, PDX1, PAX6, C-peptide (CP), or with DAPI. Scale bar, 100  $\mu$ m.  
(B) Representative flow cytometric dot plots of dispersed stage 6 clusters immunostained for the indicated markers.  
(C) Box-and-whiskers plots quantifying fraction of cells expressing the indicated markers. Each point is an independent experiment.  
(D) Real-time PCR analysis of stage 6 cells generated with the protocol from this study ( $n = 8$ ), stage 6 cells generated with the Pagliuca protocol ( $n = 5$ ), and cadaveric human islets ( $n = 7$ ). n.s., not significant, \* $p < 0.05$ , \*\* $p < 0.01$ , \*\*\* $p < 0.001$ , \*\*\*\* $p < 0.0001$  by one-way ANOVA Dunnett multiple comparison test compared with this study. All stage 6 data shown are with HUES8. Data are shown as means  $\pm$  SEM.

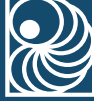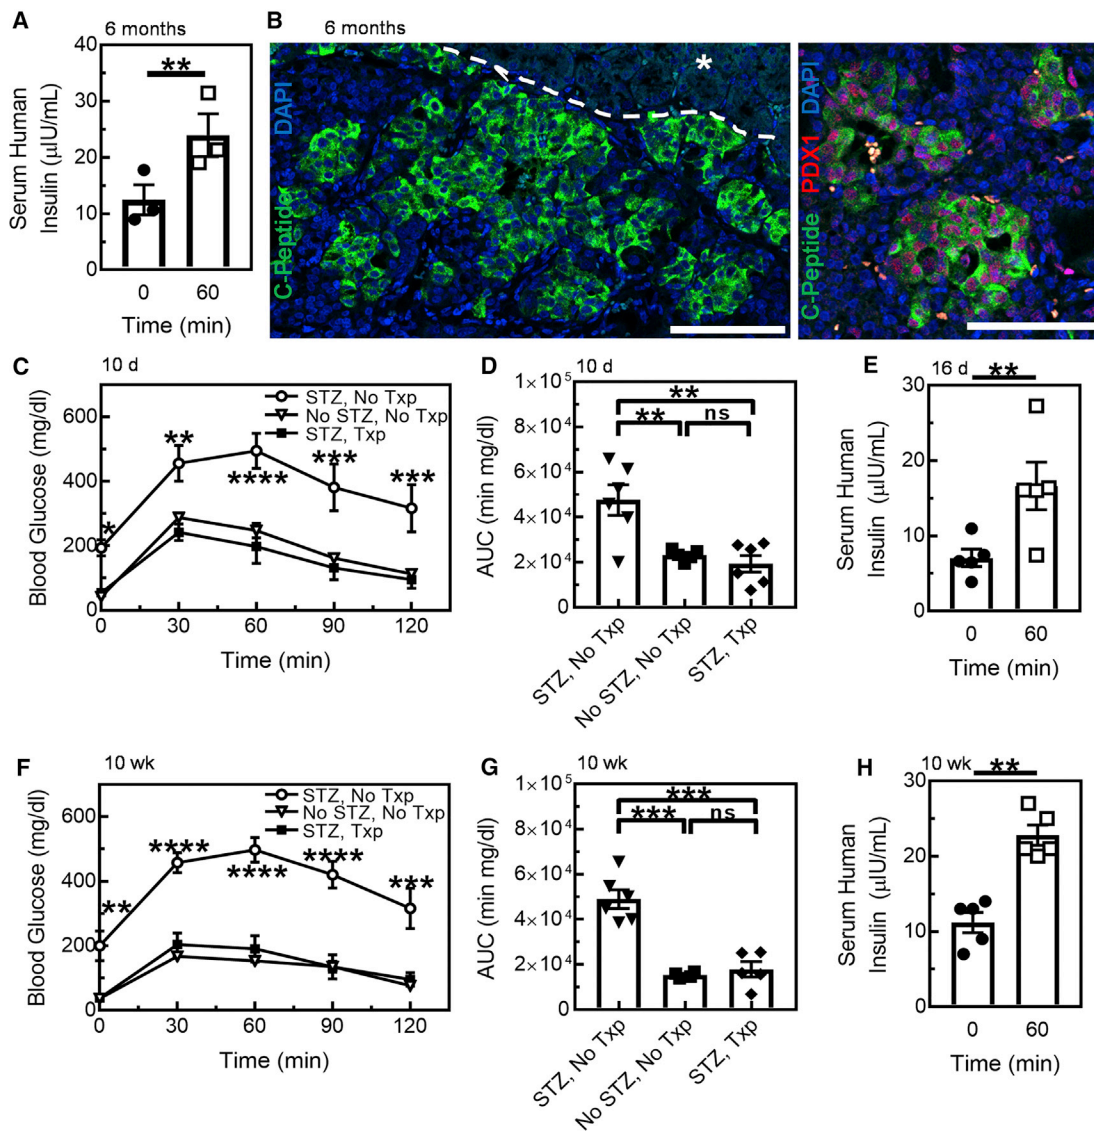

**Figure 3. SC-β Cells Greatly Improve Glucose Tolerance and Have Persistent Function for Months after Transplantation**

(A) Serum human insulin of a non-STZ-treated mouse cohort (n = 3) 6 months after transplantation fasted overnight 0 and 60 min after an injection of 2 g/kg glucose. \*\*p < 0.01 by one-sided paired t test.

(B) Immunostaining of sectioned explanted kidneys of non-STZ-treated mice 6 months after transplantation for C-peptide, PDX1, or with DAPI. The white dashed line is manually drawn to show the border between kidney and graft (\*). Scale bars, 50 μm.

(C) Glucose tolerance test (GTT) 10 days after surgery for STZ-treated mice cohort without a transplant (STZ, No Txp; n = 6), untreated mice without a transplant (No STZ, No Txp; n = 5), and STZ-treated mice with a transplant (STZ, Txp; n = 6). \*p < 0.05, \*\*p < 0.01, \*\*\*p < 0.001, \*\*\*\*p < 0.0001 by two-way ANOVA Tukey multiple comparison.

(D) Area under the curve (AUC) calculations for data shown in (C). \*\*p < 0.01 by one-way ANOVA Tukey multiple comparison test.

(E) Serum human insulin of STZ, Txp mice (n = 5) fasted overnight 0 and 60 min after an injection of 2 g/kg glucose. \*\*p < 0.01 by one-sided paired t test.

(F) GTT 10 weeks after surgery for STZ, No Txp mice (n = 6), No STZ, No Txp mice (n = 4), and STZ, Txp mice (n = 5). \*\*p < 0.01, \*\*\*p < 0.001, \*\*\*\*p < 0.0001 by two-way ANOVA Tukey multiple comparison test.

(G) AUC calculations for data shown in (F). \*\*\*p < 0.001 by one-way ANOVA Tukey multiple comparison test.

(H) Serum human insulin of STZ, Txp mice (n = 5) fasted overnight 0 and 60 min after an injection of 2 g/kg glucose. \*\*p < 0.01 by one-sided paired t test. All data shown are with HUES8. (A and B) are severe combined immunodeficiency (SCID)/Beige and (C–H) are non-obese diabetic/SCID mice.

Data are shown as means ± SEM.



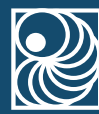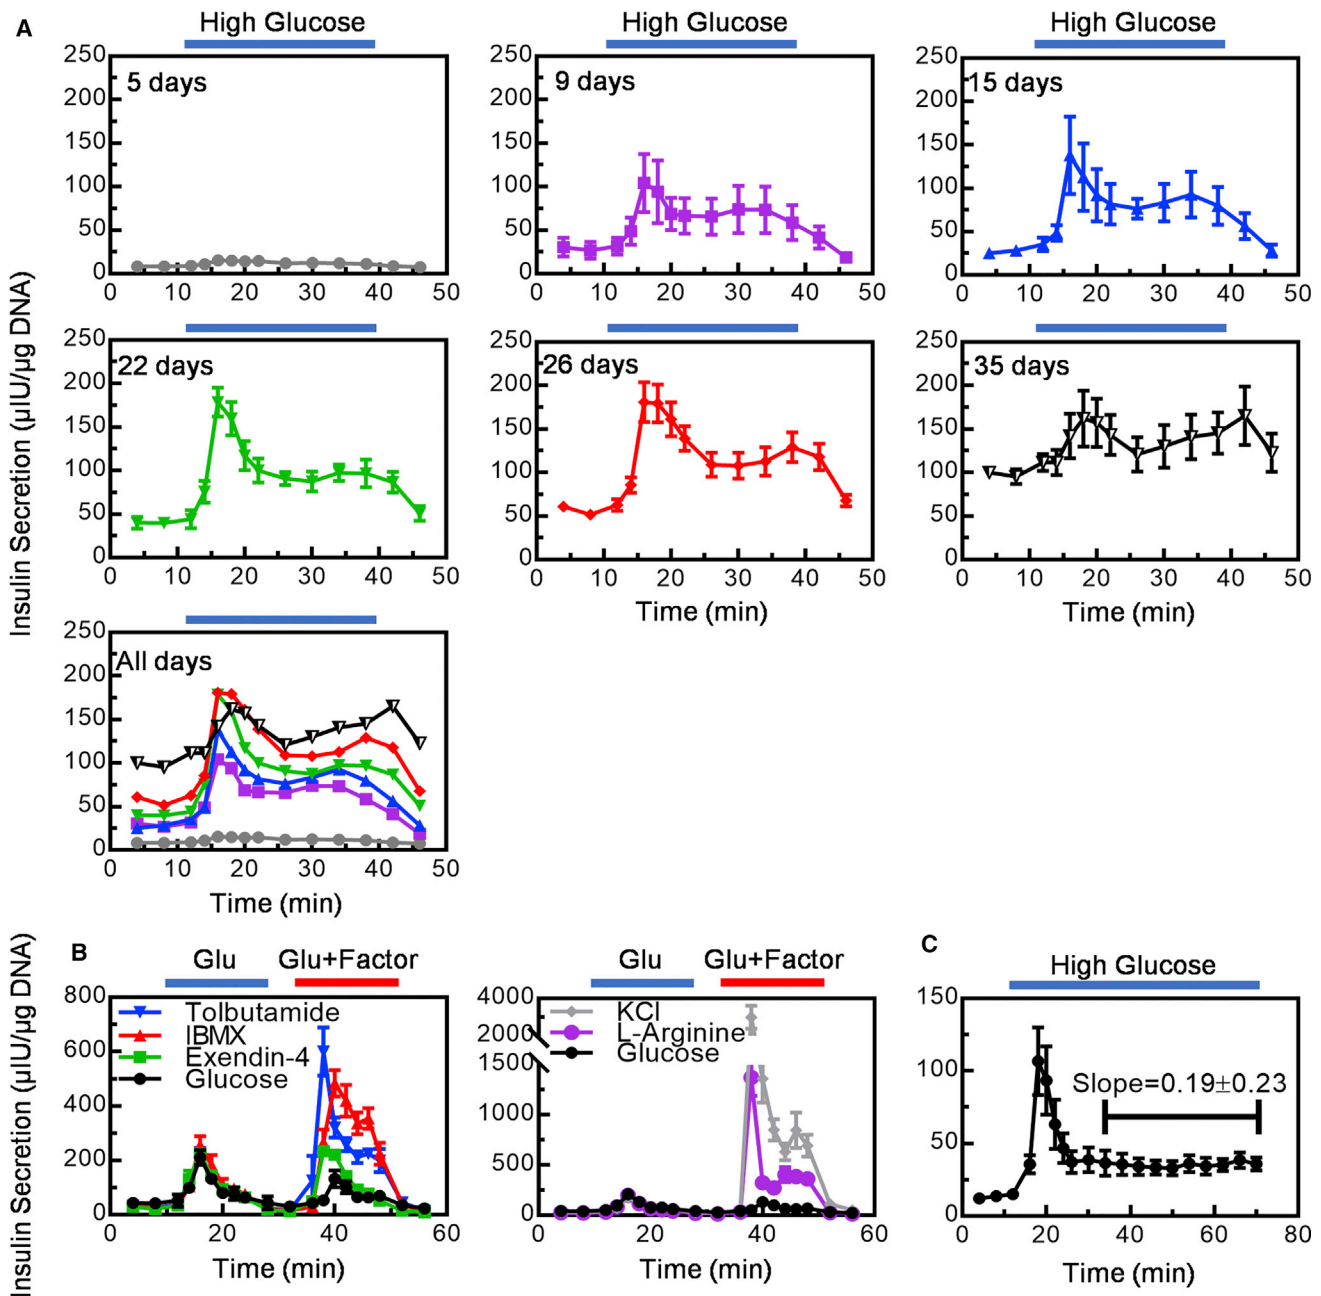

**Figure 4. SC- $\beta$  Cells have Transient Dynamic Function *In Vitro*, Respond to Multiple Stimuli, and Sustain Second-Phase Insulin Secretion at High Glucose**

(A) Dynamic human insulin secretion cells in stage 6 for 5, 9, 15, 22, 26, and 35 days in a perfusion GSIS assay. Data for each individual time point is shown as mean  $\pm$  SEM and the final graph shows only the means of each graph. Cells are perfused with low glucose (2 mM) except where high glucose (20 mM) is indicated ( $n = 3$  for each stage 6 time point).

(B) Dynamic human insulin secretion of stage 6 cells in a perfusion GSIS assay treated with multiple secretagogues. Cells are perfused with low glucose (2 mM) except where high (20 mM) glucose is indicated (Glu), then perfused with a second challenge of high glucose alone or with additional compounds (tolbutamide, IBMX, and Exendin-4 on the left; KCl and L-arginine on the right) where indicated (Glu + Factor). Note that the high glucose-only challenge is shown in both left and right graphs and the scale change ( $n = 3$  except glucose, which is  $n = 2$ ).

(C) Dynamic human insulin secretion of stage 6 cells in a perfusion GSIS assay with an extended high glucose treatment. Cells are perfused with low glucose (2 mM) except where high glucose (20 mM) is indicated ( $n = 3$ ). All data shown are with HUES8.

Data are shown as means  $\pm$  SEM.



During this time, the fraction of C-peptide+ cells decreased slightly (Figure S5A). By 35 days, insulin secretion at low glucose had risen such that first and second phases were difficult to clearly identify. These data show that SC- $\beta$  cells require 9 days in stage 6 to acquire dynamic function, this function persists for weeks, but after extended *in vitro* culture glucose responsiveness is lost. Similarly, cadaveric human islets are known to have a limited functional lifetime *in vitro*, but the cause of this is not clear. These data further suggest an optimal time frame for these cells to be used in transplantation and drug-screening studies.

To further characterize dynamic insulin secretion, we performed perfusion experiments to assay whether SC- $\beta$  cells could respond to sequential challenges with several known secretagogues (Figure 4B). After an initial high glucose challenge, SC- $\beta$  cells were able to respond to a second high glucose-only challenge, albeit less strongly than the first challenge, and extending the first glucose challenge to 1 hr in a separate experiment did not reduce insulin secretion (Figure 4C). Addition of other secretagogues during the second challenge further increased insulin secretion (Figure 4B). Membrane depolarizers KCl and L-arginine had the largest increases. Tolbutamide (blocks potassium channel), 3-isobutyl-1-methylxanthine (IBMX) (raises cytosolic cAMP), and exendin-4 (agonist of GLP-1 receptor) also increased insulin secretion over high glucose alone. Not only was insulin secretion increased but it rose faster than with high glucose alone. However, we noted that the response of stage 6 cells to KCl challenge was stronger than in human islets (Figure S5B), an observation made by others comparing  $\beta$ -like cells to human islets (Rezania et al., 2014), possibly indicative of continued immature or juvenile  $\beta$  cell phenotype. Taken together, these data show that SC- $\beta$  cells can respond to several secretagogues that have diverse modes of action and have potential application in drug screening.

### Role of TGF- $\beta$ Signaling in SC- $\beta$ Cell Differentiation and Maturation

After having evaluated SC- $\beta$  cells generated with our protocol, we investigated the protocol changes that were made to gain insights into SC- $\beta$  cell differentiation and maturation. We found that, while inclusion of Alk5i during stage 6 resulted in relatively weak but statistically significant GSIS in a static assay, similar to data from the Pagliuca protocol (Figure 1D), omission of Alk5i drastically increased insulin secretion and glucose stimulation (Figures 5A and S6A). Insulin content also increased with removal of Alk5i during stage 6 (Figure 5B), but the proinsulin/insulin ratio remained similar (Figure 5C), suggesting that the increased insulin content is not due to hormone processing. Furthermore, the fraction of cells expressing pancreatic endocrine markers, including C-peptide, remained

similar between DMSO- and Alk5i-treated cells (Figures 5D, 5E, and S6B). Gene expression was similar overall with and without Alk5i treatment, with cluster resizing typically having a larger effect (Figure S6C). Cells treated with Alk5i during stage 6 also had dramatically reduced insulin secretion with the dynamic GSIS assay, displaying weak to no first- and second-phase response (Figure 5F), similar to cells generated with the Pagliuca protocol (Figure 1F). These data show that Alk5i treatment during stage 6 inhibits functional maturation of SC- $\beta$  cells.

Our studies with Alk5i during stage 6 suggested that permitting TGF- $\beta$  signaling was necessary for robust functional maturation of SC- $\beta$  cells, as inhibition of TGFBR1 is the canonical function of Alk5i. To test this hypothesis, we first used western blot analysis to validate that TGF- $\beta$  signaling was occurring in our stage 6 cells via SMAD phosphorylation (Figure 6A). Alk5i treatment diminished phosphorylated SMAD, confirming that TGF- $\beta$  signaling was indeed occurring and inhibited by Alk5i. SMAD phosphorylation was observed in stage 6 clusters regardless of whether they were resized, consistent with observations that Alk5i treatment reduced GSIS regardless of resizing (Figure S7). Next, we generated two lentiviruses carrying short hairpin RNA (shRNA) designed to knock down TGFBR1 (TGFBR1 no. 1 and no. 2). These viruses were capable of reducing TGFBR1 transcript compared with control virus targeting GFP in stage 6 cells (Figure 6B) and reduced SMAD phosphorylation (Figures 6C and S7C), albeit to much lesser extent than Alk5i treatment (Figure 6A). Similar to Alk5i treatment (Figures 5A and 5F), stage 6 cells transduced with shRNA against TGFBR1 had reduced insulin secretion and reduced positive glucose responsiveness in the static GSIS assay (Figure 6C) and blunted glucose response in the dynamic GSIS assay (Figure 6D). These data show that permitting TGF- $\beta$  signaling during stage 6 is important for SC- $\beta$  cell functional maturation, which is inhibited by treatment with Alk5i.

Finally, we studied the role of Alk5i during stage 5 of differentiation to evaluate its effects on differentiation toward pancreatic endocrine cells, as it had been used previously for endocrine induction (Millman et al., 2016; Pagliuca et al., 2014; Rezania et al., 2014; Russ et al., 2015; Zhu et al., 2016). These experiments were performed as outlined in Figure 1A in the presence or absence of Alk5i. We observed that the fraction of cells differentiated to endocrine cells (CHGA+) was unchanged but the fraction of cells differentiated to a C-peptide+ phenotype was decreased by omitting Alk5i (Figures 7A–7C). Similarly, the fraction of cells co-expressing C-peptide and NKX6-1, an important transcription factor for specifying  $\beta$  cells (Rezania et al., 2013; Rieck et al., 2012), was decreased by omitting Alk5i. INS and GCG gene expression decreased with Alk5i omission, but surprisingly SST expression was slightly increased



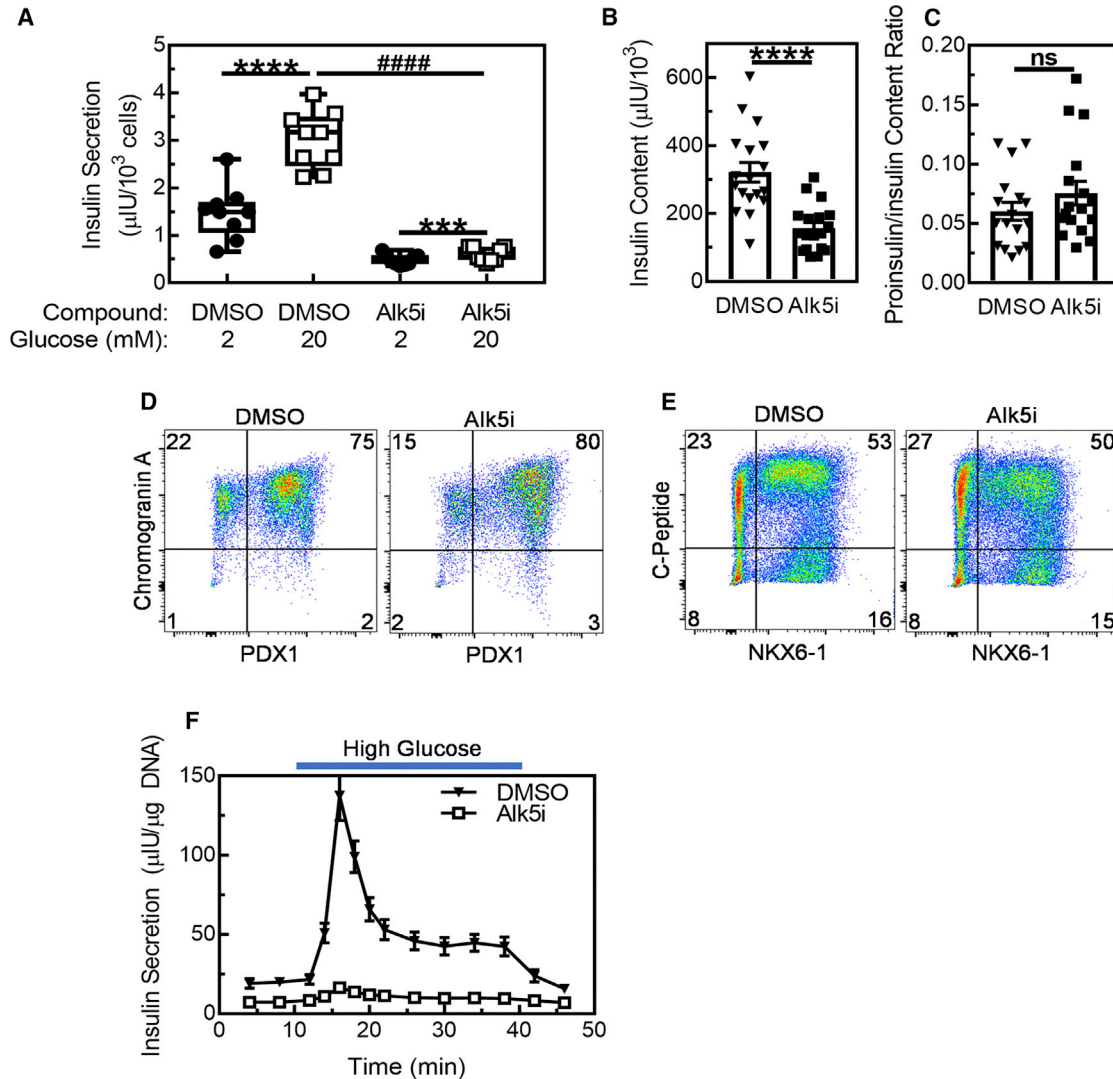

### Figure 5. Alk5i Reduces SC-β Cell GSIS

(A) Box-and-whiskers plot of human insulin secretion of stage 6 cells in static GSIS assay treated with DMSO or Alk5i (n = 9). \*\*\*p < 0.001, \*\*\*\*p < 0.0001 by two-way paired t test; #####p < 0.0001 by two-way unpaired t test.

(B) Cellular insulin content of stage 6 cells treated with DMSO or Alk5i (n = 18). \*\*\*\*p < 0.0001 by two-way unpaired t test.

(C) Cellular proinsulin/insulin content ratio of stage 6 cells treated with DMSO or Alk5i (n = 17). n.s., not significant by two-way unpaired t test.

(D and E) Representative flow cytometric dot plots of dispersed stage 6 clusters immunostained for CHGA and PDX1 (D) or C-peptide and NKX6-1 (E).

(F) Dynamic human insulin secretion of stage 6 cells treated with DMSO or Alk5i in a perfusion GSIS assay. Cells are perfused with low glucose (2 mM) except where high glucose (20 mM) is indicated (n = 12). All data shown are with HUES8.

Data are shown as means ± SEM.

(Figure 7D). Expression of NKX6-1 and PDX1 were reduced without Alk5i (Figure 7E), while expression of several pancreatic endocrine markers were either unchanged or only slightly changed (Figure 7F). To further test the importance of Alk5i during stage 5, cells treated with or without Alk5i during stage 5 were further cultured for 7 days in stage 6 without Alk5i nor cluster resizing, and insulin secretion

was substantially higher in cells treated with Alk5i during stage 5 (Figure 7G). Taken together, these data show that Alk5i treatment during stage 5 positively influences specification to β-like cell fate, not necessary to specify endocrine cells, and is necessary for high insulin secretion of resulting SC-β cells. In addition, these observations illustrate the importance of stage-specific treatment of the TGF-β

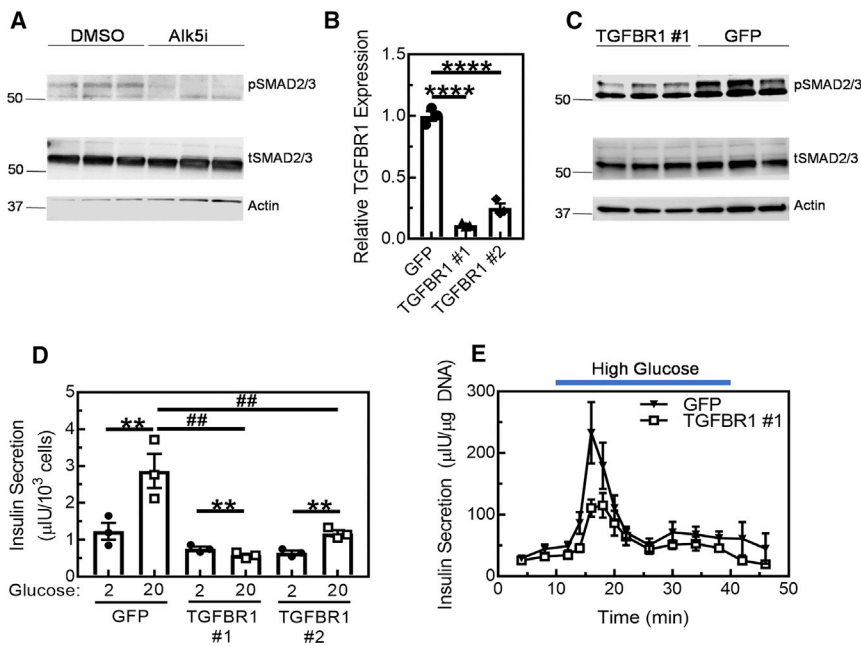

**Figure 6. Blocking TGF- $\beta$  Signaling during Stage 6 Hampers GSIS**

(A) Western blot of stage 6 cells cultured with DMSO or Alk5i stained for phosphorylated SMAD 2/3 (pSMAD2/3), total SMAD 2/3 (tSMAD2/3), and actin. Data shown are from HUES8.

(B) Real-time PCR of stage 6 cells transduced with lentiviruses containing GFP (control) or one of two sequences against TGFBFR1 (TGFBFR1 no. 1 and no. 2) ( $n = 3$ ) shRNA. \*\*\*\* $p < 0.0001$  by one-way ANOVA Dunnett multiple comparison test compared with GFP.

(C) Western blot of stage 6 cells transduced with lentiviruses containing GFP or TGFBFR1 no. 1 shRNA. Data shown are from 1013-4FA.

(D) Human insulin secretion of stage 6 cells in static GSIS assay transduced with lentiviruses containing GFP, TGFBFR1 no. 1 or no. 2 shRNA ( $n = 3$ ). \*\* $p < 0.01$  by paired two-way t test. ## $p < 0.01$  by one-way ANOVA Dunnett multiple comparison test compared with GFP. Data shown are from HUES8.

(E) Dynamic human insulin secretion of stage 6 cells transduced with lentiviruses containing GFP or TGFBFR1 no. 1 shRNA in a perfusion GSIS assay. Cells are perfused with low glucose (2 mM) except where high glucose (20 mM) is indicated ( $n = 4$ ). Data shown are from HUES8. Data are shown as means  $\pm$  SEM.

signaling-inhibitor Alk5i to both generate and functionally mature SC- $\beta$  cells.

## DISCUSSION

Here we demonstrate that enhanced functional maturation of SC- $\beta$  cells is achieved with our six-stage differentiation strategy. These cells secrete a large amount of insulin and are glucose responsive, displaying both first- and second-phase insulin release. This differentiation procedure generates almost pure endocrine cell populations without selection or sorting, and most cells express C-peptide and other  $\beta$  cell markers. Upon transplantation into STZ-treated mice, glucose tolerance is rapidly restored and function persists for months. These SC- $\beta$  cells respond to multiple secretagogues in a perfusion assay. We found modulating TGF- $\beta$  signaling to be crucial for success, with inhibition during stage 5 increasing SC- $\beta$  cell differentiation but inhibition during stage 6 reducing function and insulin content. Permitting TGF- $\beta$  signaling during stage 6 was necessary for robust dynamic function.

Even though the protocols reported previously by us (Pagliuca et al., 2014) and others (Rezania et al., 2014) both generated  $\beta$ -like cells with much greater function and better marker expression than prior reports (Hrvatin et al., 2014), robust first- and second-phase insulin release in response to glucose stimulation was not observed. Both

protocols inhibited TGF- $\beta$  signaling during the final stage of differentiation, and many subsequent reports also include inhibitors of TGF- $\beta$  signaling without demonstrating proper dynamic function (Ghazizadeh et al., 2017; Millman et al., 2016; Song and Millman, 2016; Sui et al., 2018; Vegas et al., 2016; Zeng et al., 2016; Zhu et al., 2016). However, a major observation of the current study is that correct modulation of TGF- $\beta$  signaling during key cell transition and maturation steps is critical for successful differentiation to functional SC- $\beta$  cells, with permitting TGF- $\beta$  signaling being required for improved functional maturation during stage 6.

SC- $\beta$  cells in this report were able to control glucose in STZ-treated mice rapidly within 10 days. Prior reports with *in-vitro*-differentiated  $\beta$ -like cells without demonstrated robust dynamic function have successfully controlled blood sugar with a glucose tolerance test or demonstrated glucose-responsive serum human insulin/C-peptide in mice after several weeks or months (Millman et al., 2016; Pagliuca et al., 2014; Rezania et al., 2014; Vegas et al., 2016; Zhu et al., 2016), but our SC- $\beta$  cells had higher measured human insulin levels compared with Pagliuca et al. (2014) with equal cell numbers transplanted. Vegas et al. (2016) did demonstrate reduced blood glucose within a week but did not test glucose tolerance or measure human insulin until much later. Currently, a key limitation in diabetes cell replacement therapy is the need for sustainable source of functional  $\beta$  cells (Weir et al., 2011), and

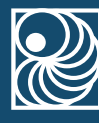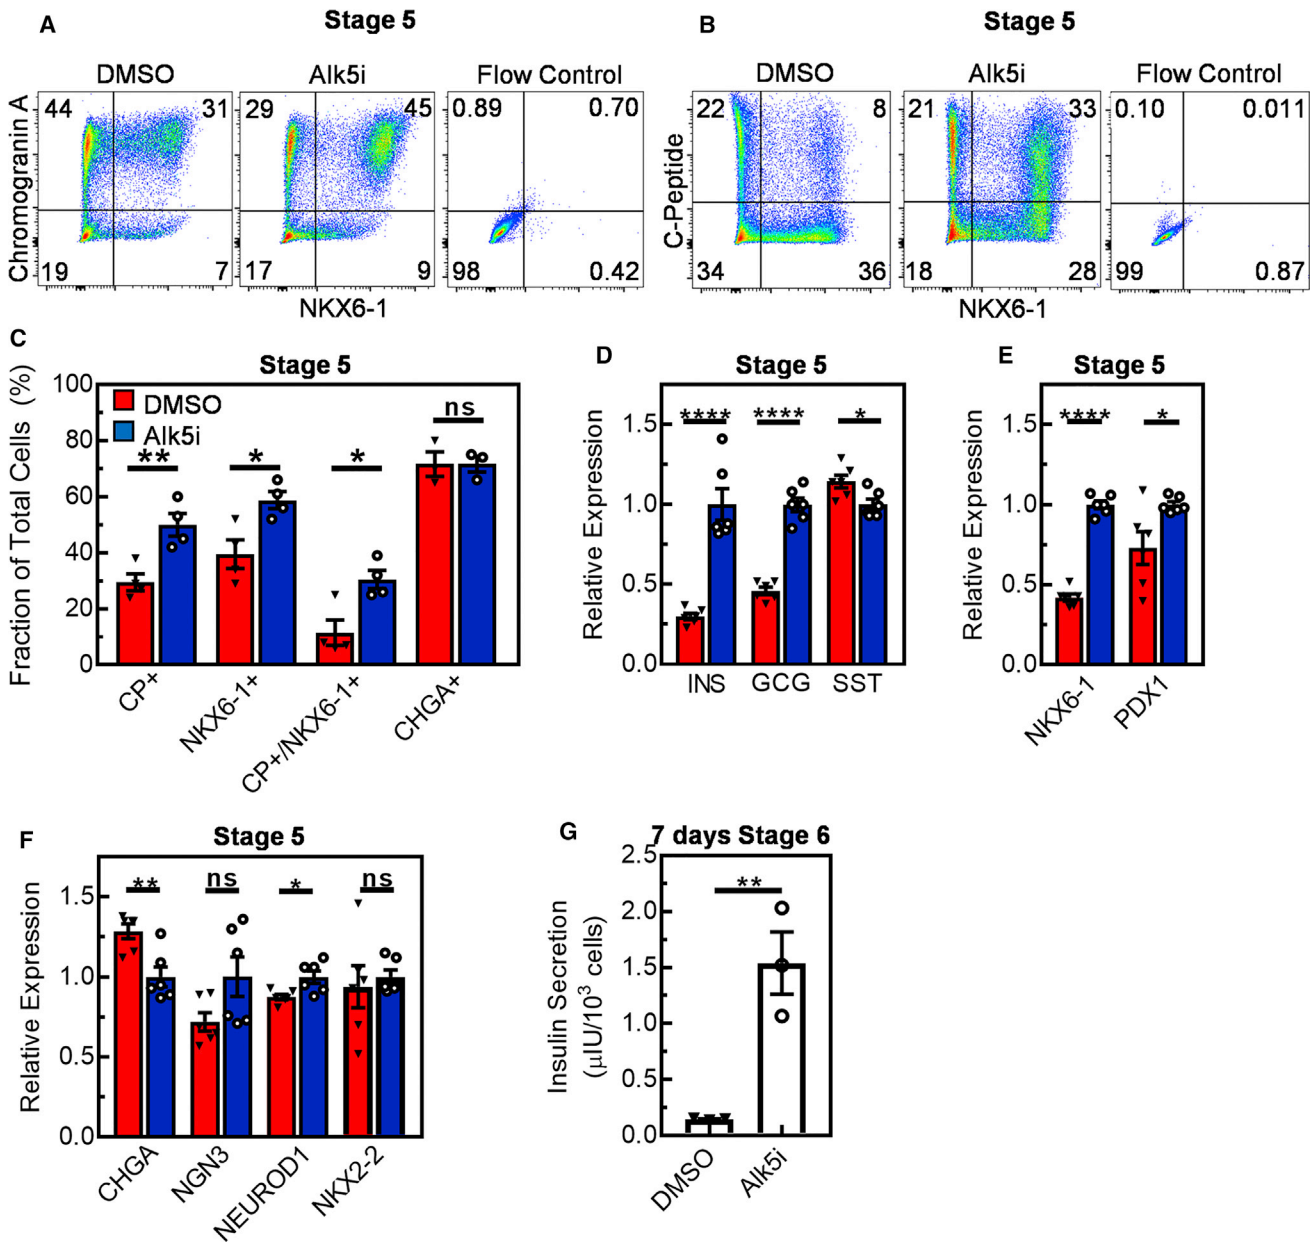

**Figure 7. Alk5i Treatment during Stage 5 Is Important for Generation of Insulin-Producing Cells**

(A and B) Representative flow cytometric dot plots of dispersed stage 5 clusters immunostained for CHGA and NKX6-1 (A) or C-peptide and NKX6-1 (B).

(C) Fraction of cells expressing the indicated markers ( $n = 4$  except CHGA, which was  $n = 3$ ). \* $p < 0.05$ , \*\* $p < 0.01$  or n.s., not significant by unpaired two-way t test.

(D–F) Real-time PCR measuring relative gene expression of stage 5 cells cultured with DMSO or Alk5i for pancreatic hormones (D),  $\beta$  cell markers (E), or endocrine markers (F) ( $n = 6$ ). \* $p < 0.05$ , \*\* $p < 0.01$ , \*\*\*\* $p < 0.0001$ , or n.s., not significant by unpaired two-way t test.

(G) Human insulin secretion at 20 mM glucose of cells cultured in stage 5 in either DMSO or Alk5i plus an additional 7 days in stage 6 without Alk5i and without cluster resizing ( $n = 3$ ). \*\* $p < 0.01$  by unpaired two-way t test. All data shown are from HUES8.

Data are shown as means  $\pm$  SEM.

improving the quality of SC- $\beta$  cells to be transplanted helps overcome this challenge (Tomei et al., 2015). Transplantation of immature pancreatic progenitor cells are an alterna-

tive cell type that has shown promise in rodents, where some cells undergo *in vivo* maturation to  $\beta$ -like cells after several months (Bruin et al., 2015; Kroon et al., 2008;





Millman et al., 2016; Rezanian et al., 2012). However, the mechanism is unknown, and how successful the process would be in humans is not clear, especially since the efficiency between rats and mice is very different (Bruin et al., 2015). Our process for making SC- $\beta$  cells is scalable, with the cells grown and differentiated as clusters in suspension culture. The use of clusters in suspension culture allows flexibility for many applications, such as large animal transplantation studies or therapy (order  $10^9$  cells) (McCall and Shapiro, 2012; Shapiro et al., 2006) or studying patient cells and disease pathology ( $<10^8$  cells) (Kudva et al., 2012; Maehr et al., 2009; Millman et al., 2016; Shang et al., 2014; Simsek et al., 2016; Teo et al., 2013).

Our strategy enhances the utility of *in-vitro*-differentiated SC- $\beta$  cells for drug screening due to their improved kinetics. Proper dynamic insulin release is an important feature of  $\beta$  cell metabolism that is commonly lost in diabetes (Caumo and Luzi, 2004; Del Prato and Tiengo, 2001; Seino et al., 2011; Zhang et al., 2001). We have established a renewable resource of SC- $\beta$  cells with dynamic insulin release that can be used to better study the mechanism of  $\beta$  cell failure in diabetes and demonstrated their response to several secretagogues.

The culmination of numerous modifications to the protocol produced SC- $\beta$  cells exhibiting dynamic glucose response. In addition to modulating TGF- $\beta$  signaling, other notable changes included the removal of serum, reducing cluster size, and the lack of several additional factors (T3, N-acetyl cysteine, Trolox, H1152, and R428) used in other reports during the last stage. We hope that these insights provide the basis for further innovations for differentiating SC- $\beta$  cells and improving function, especially as a recent report indicates there may be multiple pathways to  $\beta$  cells (Petersen et al., 2017). While we demonstrate reproducibility of the protocol across multiple cell lines, marker expression and function were greatest in the HUES8 cell line. As this protocol was initially developed for this line, we suspect additional optimization to be beneficial when applying this protocol to additional lines.

Even with these functional improvements over previously published SC- $\beta$  cells, islets averaged higher insulin secretion and glucose stimulation, particularly second-phase release. These differences are more pronounced when comparing the best human islets in this dataset, which secreted 21  $\mu\text{IU}/10^3$  cells and had stimulated insulin increase of 11, to the best stage 6 cells, which secreted 9  $\mu\text{IU}/10^3$  cells and had a stimulated increase of 5, in static assays. Our stage 6 cells had reduced average insulin secretion at low glucose in static assays, but elevated insulin secretion at low glucose in perfusion assays compared with islets on average, perhaps due to paracrine differences. Comparisons with islets were complicated due to donor-to-donor variation, which has been observed previously (Kay-

ton et al., 2015; Lyon et al., 2016; Pagliuca et al., 2014). We do note that islets in our study were typically more functional than in other studies (Ghazizadeh et al., 2017; Pagliuca et al., 2014; Rezanian et al., 2014; Russ et al., 2015; Sui et al., 2018), which we believe is important to rigorously benchmark SC- $\beta$  cells. In addition, some islet genes remain underexpressed in our cells. Furthermore, while the data we generated with the Pagliuca protocol were within the range of data presented in the 2014 report, we acknowledge that the static GSIS values were lower on average, likely due in part to technical differences in how the assays were performed. Another potential contributor is batch-to-batch variability, as stated in the 2014 report, which could be caused by the use of different lots of serum during stage 6 and was eliminated in our protocol. Even with these difficulties and insights, we acknowledge that even further maturation of SC- $\beta$  cells is possible, building on this report and the original 2014 breakthroughs.

This study provides insights into the role of TGF- $\beta$  signaling in functional maturation. Prior reports are unclear on this topic, with some showing TGF- $\beta$  inhibition to benefit (Lin et al., 2009) and others to harm (Totsuka et al., 1989) secretion. Inhibition has been shown to promote replication (Dhawan et al., 2016), protect against stress-induced loss of phenotype (Blum et al., 2014; Millman et al., 2016), and reduce apoptosis in a GLIS3 knockout model (Amin et al., 2018). Interestingly, we also observed that removal of Alk5i during stage 5 does not affect the overall percentage of cells expressing CHGA, but influences the expression of INS, GCG, and SST, suggesting a role in TGF- $\beta$  signaling in endocrine subtype specification. It is important to note that we did not identify the downstream effectors of TGF- $\beta$  signaling responsible for the reported phenotypes, and further study is warranted.

## EXPERIMENTAL PROCEDURES

### Culture of Undifferentiated Cells

Undifferentiated hPSC lines were cultured using mTeSR1 in 30-mL spinner flasks on a rotator stir plate spinning at 60 rpm in a humidified 5% CO<sub>2</sub> 37°C incubator. Cells were passaged every 3–4 days by single-cell dispersion.

### Cell Line Differentiation

To initiate differentiation, undifferentiated cells were single-cell dispersed and seeded at  $6 \times 10^5$  cells/mL in a 30-mL spinner flask. Cells were cultured for 72 hr in mTeSR1 and then cultured in the differentiation media for 6 stages outlined in the [Supplemental Experimental Procedures](#), except where otherwise noted. Cells were resized the first day of stage 6 by incubating in Gentle Cell Dissociation Reagent and passing through a cell strainer. Assessment assays were performed between 10 and 16 days of stage 6 unless otherwise stated.



## Static GSIS

Clusters were incubated at 2 mM glucose for a 1 hr equilibration in a transwell. The transwell was then drained and transferred into a new 2 mM glucose well, incubated 1 hr (first challenge), then transferred into a solution of 2, 5.6, 11.1, or 20 mM glucose (second challenge), incubated 1 hr, and then normalized by cell count and insulin quantified with ELISA.

## Dynamic GSIS

A perfusion system was assembled as reported previously (Bentsi-Barnes et al., 2011). Stage 6 clusters and islets were assayed with effluent collected at a 100- $\mu$ L/min flow rate every 2–4 min, exposed to the indicated secretagogues, including glucose, Extendin-4, IBMX, tolbutamide, L-arginine, and KCl. After sample collection, DNA and insulin were quantified.

## Transplantation Studies

All animal work was performed in accordance to Washington University International Animal Care and Use Committee regulations. Mice were injected with  $\sim 5 \times 10^6$  stage 6 cells under the kidney capsule (Pagliuca et al., 2014) and monitored up to 6 months by performing glucose tolerance tests and *in vivo* GSIS.

## Statistical Analysis

Statistical significance was calculated using GraphPad Prism using the indicated statistical test. Slope and error in slope was calculated with the LINEST function in Excel. Data shown as mean  $\pm$  SEM unless otherwise noted or box-and-whiskers showing minimum to maximum point range, as indicated. n indicates the total number of independent experiments.

## SUPPLEMENTAL INFORMATION

Supplemental Information includes Supplemental Experimental Procedures and seven figures and can be found with this article online at <https://doi.org/10.1016/j.stemcr.2018.12.012>.

## AUTHOR CONTRIBUTIONS

L.V.C., J.S., and J.R.M. conceived of the experimental design. All authors contributed to the *in vitro* experiments. L.V.C., K.G.M., and J.R.M. performed all *in vivo* experiments. L.V.C. and J.R.M. wrote the manuscript. All authors edited and reviewed the manuscript.

## ACKNOWLEDGMENTS

This work was supported by the NIH (5R01DK114233), JDRF Career Development Award (5-CDA-2017-391-A-N), Washington University Diabetes Research Center Pilot & Feasibility Award and Imaging Scholarship (5P30DK020579), Washington University Center of Regenerative Medicine, and startup funds from Washington University School of Medicine Department of Medicine. L.V.C. was supported by the NIH (2R25GM103757). K.G.M. was supported by the NIH (5T32DK108742). N.J.H. was supported by the NIH (5T32DK007120). We thank John Dean, Lisa Gutgesell, and Eli Silvert for providing technical assistance and the Amgen Scholars program for supporting Lisa and Eli. Confocal microscopy

was performed through the Washington University Center for Cellular Imaging (WUCCI). The viral work was supported by the Hope Center Viral Vectors Core at Washington University School of Medicine. L.V.C., J.S., and J.R.M. are inventors on related patent applications.

Received: August 31, 2018

Revised: December 12, 2018

Accepted: December 14, 2018

Published: January 17, 2019

## REFERENCES

- Amin, S., Cook, B., Zhou, T., Ghazizadeh, Z., Lis, R., Zhang, T., Khalaj, M., Crespo, M., Perera, M., Xiang, J.Z., et al. (2018). Discovery of a drug candidate for GLIS3-associated diabetes. *Nat. Commun.* 9, 2681.
- Arda, H.E., Li, L., Tsai, J., Torre, E.A., Rosli, Y., Peiris, H., Spitale, R.C., Dai, C., Gu, X., Qu, K., et al. (2016). Age-dependent pancreatic gene regulation reveals mechanisms governing human beta cell function. *Cell Metab.* 23, 909–920.
- Baron, M., Veres, A., Wolock, S.L., Faust, A.L., Gaujoux, R., Vetere, A., Ryu, J.H., Wagner, B.K., Shen-Orr, S.S., Klein, A.M., et al. (2016). A single-cell transcriptomic map of the human and mouse pancreas reveals inter- and intra-cell population structure. *Cell Syst.* 3, 346–360.e4.
- Bellin, M.D., Barton, F.B., Heitman, A., Harmon, J.V., Kandaswamy, R., Balamurugan, A.N., Sutherland, D.E., Alejandro, R., and Hering, B.J. (2012). Potent induction immunotherapy promotes long-term insulin independence after islet transplantation in type 1 diabetes. *Am. J. Transplant.* 12, 1576–1583.
- Bentsi-Barnes, K., Doyle, M.E., Abad, D., Kandeel, F., and Al-Abdullah, I. (2011). Detailed protocol for evaluation of dynamic perfusion of human islets to assess beta-cell function. *Islets* 3, 284–290.
- Blum, B., Roose, A.N., Barrandon, O., Maehr, R., Arvanites, A.C., Davidow, L.S., Davis, J.C., Peterson, Q.P., Rubin, L.L., and Melton, D.A. (2014). Reversal of beta cell de-differentiation by a small molecule inhibitor of the TGFbeta pathway. *Elife* 3, e02809.
- Bonner-Weir, S., and Weir, G.C. (2005). New sources of pancreatic beta-cells. *Nat. Biotechnol.* 23, 857–861.
- Bruin, J.E., Asadi, A., Fox, J.K., Erenner, S., Rezanian, A., and Kieffer, T.J. (2015). Accelerated maturation of human stem cell-derived pancreatic progenitor cells into insulin-secreting cells in immunodeficient rats relative to mice. *Stem Cell Reports* 5, 1081–1096.
- Caumo, A., and Luzi, L. (2004). First-phase insulin secretion: does it exist in real life? Considerations on shape and function. *Am. J. Physiol. Endocrinol. Metab.* 287, E371–E385.
- D'Amour, K., Bang, A., Eliazar, S., Kelly, O., Agulnick, A., Smart, N., Moorman, M., Kroon, E., Carpenter, M., and Baetge, E. (2006). Production of pancreatic hormone-expressing endocrine cells from human embryonic stem cells. *Nat. Biotechnol.* 24, 1392–1793.
- D'Amour, K.A., Agulnick, A.D., Eliazar, S., Kelly, O.G., Kroon, E., and Baetge, E.E. (2005). Efficient differentiation of human embryonic stem cells to definitive endoderm. *Nat. Biotechnol.* 23, 1534–1541.



- Del Prato, S., and Tiengo, A. (2001). The importance of first-phase insulin secretion: implications for the therapy of type 2 diabetes mellitus. *Diabetes Metab. Res. Rev.* 17, 164–174.
- Dhawan, S., Dirice, E., Kulkarni, R.N., and Bhushan, A. (2016). Inhibition of TGF-beta signaling promotes human pancreatic beta-cell replication. *Diabetes* 65, 1208–1218.
- Ghazizadeh, Z., Kao, D.I., Amin, S., Cook, B., Rao, S., Zhou, T., Zhang, T., Xiang, Z., Kenyon, R., Kaymakalan, O., et al. (2017). ROCKII inhibition promotes the maturation of human pancreatic beta-like cells. *Nat. Commun.* 8, 298.
- Hering, B.J., Clarke, W.R., Bridges, N.D., Eggerman, T.L., Alejandro, R., Bellin, M.D., Chaloner, K., Czarniecki, C.W., Goldstein, J.S., Hunsicker, L.G., et al. (2016). Phase 3 trial of transplantation of human islets in type 1 diabetes complicated by severe hypoglycemia. *Diabetes Care* 39, 1230–1240.
- Hrvatin, S., O'Donnell, C.W., Deng, F., Millman, J.R., Pagliuca, F.W., DiIorio, P., Reznia, A., Gifford, D.K., and Melton, D.A. (2014). Differentiated human stem cells resemble fetal, not adult, beta cells. *Proc. Natl. Acad. Sci. U S A* 111, 3038–3043.
- Kayton, N.S., Poffenberger, G., Henske, J., Dai, C., Thompson, C., Aramandla, R., Shostak, A., Nicholson, W., Brissova, M., Bush, W.S., et al. (2015). Human islet preparations distributed for research exhibit a variety of insulin-secretory profiles. *Am. J. Physiol. Endocrinol. Metab.* 308, E592–E602.
- Kroon, E., Martinson, L., Kadoya, K., Bang, A., Kelly, O., Eliazar, S., Young, H., Richardson, M., Smart, N., Cunningham, J., et al. (2008). Pancreatic endoderm derived from human embryonic stem cells generates glucose-responsive insulin-secreting cells in vivo. *Nat. Biotechnol.* 26, 443–495.
- Kudva, Y.C., Ohmine, S., Greder, L.V., Dutton, J.R., Armstrong, A., De Lamo, J.G., Khan, Y.K., Thatava, T., Hasegawa, M., Fusaki, N., et al. (2012). Transgene-free disease-specific induced pluripotent stem cells from patients with type 1 and type 2 diabetes. *Stem Cell Transl. Med.* 1, 451–461.
- Lacy, P.E., and Kostianovsky, M. (1967). Method for the isolation of intact islets of Langerhans from the rat pancreas. *Diabetes* 16, 35–39.
- Lin, H.M., Lee, J.H., Yadav, H., Kamaraju, A.K., Liu, E., Zhigang, D., Vieira, A., Kim, S.J., Collins, H., Matschinsky, F., et al. (2009). Transforming growth factor-beta/Smad3 signaling regulates insulin gene transcription and pancreatic islet beta-cell function. *J. Biol. Chem.* 284, 12246–12257.
- Lyon, J., Manning Fox, J.E., Spigelman, A.F., Kim, R., Smith, N., O'Gorman, D., Kin, T., Shapiro, A.M., Rajotte, R.V., and MacDonald, P.E. (2016). Research-focused isolation of human islets from donors with and without diabetes at the Alberta Diabetes Institute isletcore. *Endocrinology* 157, 560–569.
- Maehr, R., Chen, S., Snitow, M., Ludwig, T., Yagasaki, L., Goland, R., Leibel, R.L., and Melton, D.A. (2009). Generation of pluripotent stem cells from patients with type 1 diabetes. *Proc. Natl. Acad. Sci. U S A* 106, 15768–15773.
- Mathers, C.D., and Loncar, D. (2006). Projections of global mortality and burden of disease from 2002 to 2030. *PLoS Med.* 3, e442.
- McCall, M., and Shapiro, A.M. (2012). Update on islet transplantation. *Cold Spring Harb. Perspect. Med.* 2, a007823.
- Millman, J.R., and Pagliuca, F.W. (2017). Autologous pluripotent stem cell-derived beta-like cells for diabetes cellular therapy. *Diabetes* 66, 1111–1120.
- Millman, J.R., Xie, C., Van Dervort, A., Gurtler, M., Pagliuca, F.W., and Melton, D.A. (2016). Generation of stem cell-derived beta-cells from patients with type 1 diabetes. *Nat. Commun.* 7, 11463.
- Nathan, D.M. (1993). Long-term complications of diabetes mellitus. *N. Engl. J. Med.* 328, 1676–1685.
- Nostro, M.C., Sarangi, F., Yang, C., Holland, A., Elefanty, A.G., Stanley, E.G., Greiner, D.L., and Keller, G. (2015). Efficient generation of NKX6-1(+) pancreatic progenitors from multiple human pluripotent stem cell lines. *Stem Cell Reports* 4, 591–604.
- Pagliuca, F.W., Millman, J.R., Gurtler, M., Segel, M., Van Dervort, A., Ryu, J.H., Peterson, Q.P., Greiner, D., and Melton, D.A. (2014). Generation of functional human pancreatic beta cells in vitro. *Cell* 159, 428–439.
- Petersen, M.B.K., Azad, A., Ingvorsen, C., Hess, K., Hansson, M., Grapin-Botton, A., and Honore, C. (2017). Single-cell gene expression analysis of a human ESC model of pancreatic endocrine development reveals different paths to beta-cell differentiation. *Stem Cell Reports* 9, 1246–1261.
- Reznia, A., Bruin, J.E., Arora, P., Rubin, A., Batushansky, I., Asadi, A., O'Dwyer, S., Quiskamp, N., Mojibian, M., Albrecht, T., et al. (2014). Reversal of diabetes with insulin-producing cells derived in vitro from human pluripotent stem cells. *Nat. Biotechnol.* 32, 1121–1133.
- Reznia, A., Bruin, J.E., Riedel, M.J., Mojibian, M., Asadi, A., Xu, J., Gauvin, R., Narayan, K., Karanu, F., O'Neil, J.J., et al. (2012). Maturation of human embryonic stem cell-derived pancreatic progenitors into functional islets capable of treating pre-existing diabetes in mice. *Diabetes* 61, 2016–2029.
- Reznia, A., Bruin, J.E., Xu, J., Narayan, K., Fox, J.K., O'Neil, J.J., and Kieffer, T.J. (2013). Enrichment of human embryonic stem cell-derived NKX6.1-expressing pancreatic progenitor cells accelerates the maturation of insulin-secreting cells in vivo. *Stem Cells* 31, 2432–2442.
- Rieck, S., Bankaitis, E.D., and Wright, C.V. (2012). Lineage determinants in early endocrine development. *Semin. Cell Dev. Biol.* 23, 673–684.
- Russ, H.A., Parent, A.V., Ringler, J.J., Hennings, T.G., Nair, G.G., Shveygert, M., Guo, T., Puri, S., Haataja, L., Cirulli, V., et al. (2015). Controlled induction of human pancreatic progenitors produces functional beta-like cells in vitro. *EMBO J.* 34, 1759–1772.
- Scharp, D.W., Lacy, P.E., Santiago, J.V., McCullough, C.S., Weide, L.G., Falqui, L., Marchetti, P., Gingerich, R.L., Jaffe, A.S., Cryer, P.E., et al. (1990). Insulin independence after islet transplantation into type I diabetic patient. *Diabetes* 39, 515–518.
- Seino, S., Shibasaki, T., and Minami, K. (2011). Dynamics of insulin secretion and the clinical implications for obesity and diabetes. *J. Clin. Invest.* 121, 2118–2125.
- Shang, L., Hua, H., Foo, K., Martinez, H., Watanabe, K., Zimmer, M., Kahler, D.J., Freeby, M., Chung, W., LeDuc, C., et al. (2014).  $\beta$ -Cell dysfunction due to increased ER stress in a stem cell model of Wolfram syndrome. *Diabetes* 63, 923–933.





- Shapiro, A.M., Lakey, J.R., Ryan, E.A., Korbitt, G.S., Toth, E., Warnock, G.L., Kneteman, N.M., and Rajotte, R.V. (2000). Islet transplantation in seven patients with type 1 diabetes mellitus using a glucocorticoid-free immunosuppressive regimen. *N. Engl. J. Med.* *343*, 230–238.
- Shapiro, A.M., Ricordi, C., Hering, B.J., Auchincloss, H., Lindblad, R., Robertson, R.P., Secchi, A., Brendel, M.D., Berney, T., Brennan, D.C., et al. (2006). International trial of the Edmonton protocol for islet transplantation. *N. Engl. J. Med.* *355*, 1318–1330.
- Simsek, S., Zhou, T., Robinson, C.L., Tsai, S.Y., Crespo, M., Amin, S., Lin, X., Hon, J., Evans, T., and Chen, S. (2016). Modeling cystic fibrosis using pluripotent stem cell-derived human pancreatic ductal epithelial cells. *Stem Cells Transl. Med.* *5*, 572–579.
- Song, J., and Millman, J.R. (2016). Economic 3D-printing approach for transplantation of human stem cell-derived beta-like cells. *Biofabrication* *9*, 015002.
- Stokes, A., and Preston, S.H. (2017). Deaths attributable to diabetes in the United States: comparison of data sources and estimation approaches. *PLoS One* *12*, e0170219.
- Sui, L., Danzl, N., Campbell, S.R., Viola, R., Williams, D., Xing, Y., Wang, Y., Phillips, N., Poffenberger, G., Johannesson, B., et al. (2018).  $\alpha$ -Cell replacement in mice using human type 1 diabetes nuclear transfer embryonic stem cells. *Diabetes* *67*, 26–35.
- Teo, A.K., Windmueller, R., Johansson, B.B., Dirice, E., Njolstad, P.R., Tjora, E., Raeder, H., and Kulkarni, R.N. (2013). Derivation of human induced pluripotent stem cells from patients with maturity onset diabetes of the young. *J. Biol. Chem.* *288*, 5353–5356.
- Tomei, A.A., Villa, C., and Ricordi, C. (2015). Development of an encapsulated stem cell-based therapy for diabetes. *Expert Opin. Biol. Ther.* *15*, 1321–1336.
- Totsuka, Y., Tabuchi, M., Kojima, I., Eto, Y., Shibai, H., and Ogata, E. (1989). Stimulation of insulin secretion by transforming growth factor-beta. *Biochem. Biophys. Res. Commun.* *158*, 1060–1065.
- Tritschler, S., Theis, F.J., Lickert, H., and Bottcher, A. (2017). Systematic single-cell analysis provides new insights into heterogeneity and plasticity of the pancreas. *Mol. Metab.* *6*, 974–990.
- Vegas, A.J., Veisoh, O., Gurtler, M., Millman, J.R., Pagliuca, F.W., Bader, A.R., Doloff, J.C., Li, J., Chen, M., Olejnik, K., et al. (2016). Long-term glycemic control using polymer-encapsulated human stem cell-derived beta cells in immune-competent mice. *Nat. Med.* *22*, 306–311.
- Weir, G.C., Cavelti-Weder, C., and Bonner-Weir, S. (2011). Stem cell approaches for diabetes: towards beta cell replacement. *Genome Med.* *3*, 61.
- Xin, Y., Kim, J., Okamoto, H., Ni, M., Wei, Y., Adler, C., Murphy, A.J., Yancopoulos, G.D., Lin, C., and Gromada, J. (2016). RNA sequencing of single human islet cells reveals type 2 diabetes genes. *Cell Metab.* *24*, 608–615.
- Zeng, H., Guo, M., Zhou, T., Tan, L., Chong, C.N., Zhang, T., Dong, X., Xiang, J.Z., Yu, A.S., Yue, L., et al. (2016). An isogenic human ESC platform for functional evaluation of genome-wide-association-study-identified diabetes genes and drug discovery. *Cell Stem Cell* *19*, 326–340.
- Zhang, C.Y., Baffy, G., Perret, P., Krauss, S., Peroni, O., Grujic, D., Hagen, T., Vidal-Puig, A.J., Boss, O., Kim, Y.B., et al. (2001). Uncoupling protein-2 negatively regulates insulin secretion and is a major link between obesity, beta cell dysfunction, and type 2 diabetes. *Cell* *105*, 745–755.
- Zhu, S., Russ, H.A., Wang, X., Zhang, M., Ma, T., Xu, T., Tang, S., Hebrok, M., and Ding, S. (2016). Human pancreatic beta-like cells converted from fibroblasts. *Nat. Commun.* *7*, 10080.

**Stem Cell Reports, Volume 12**

**Supplemental Information**

**Acquisition of Dynamic Function in Human Stem Cell-Derived  $\beta$  Cells**

**Leonardo Velazco-Cruz, Jiwon Song, Kristina G. Maxwell, Madeleine M. Goedegebuure, Punn Augsornworawat, Nathaniel J. Hoglebe, and Jeffrey R. Millman**

## Supplemental Figures



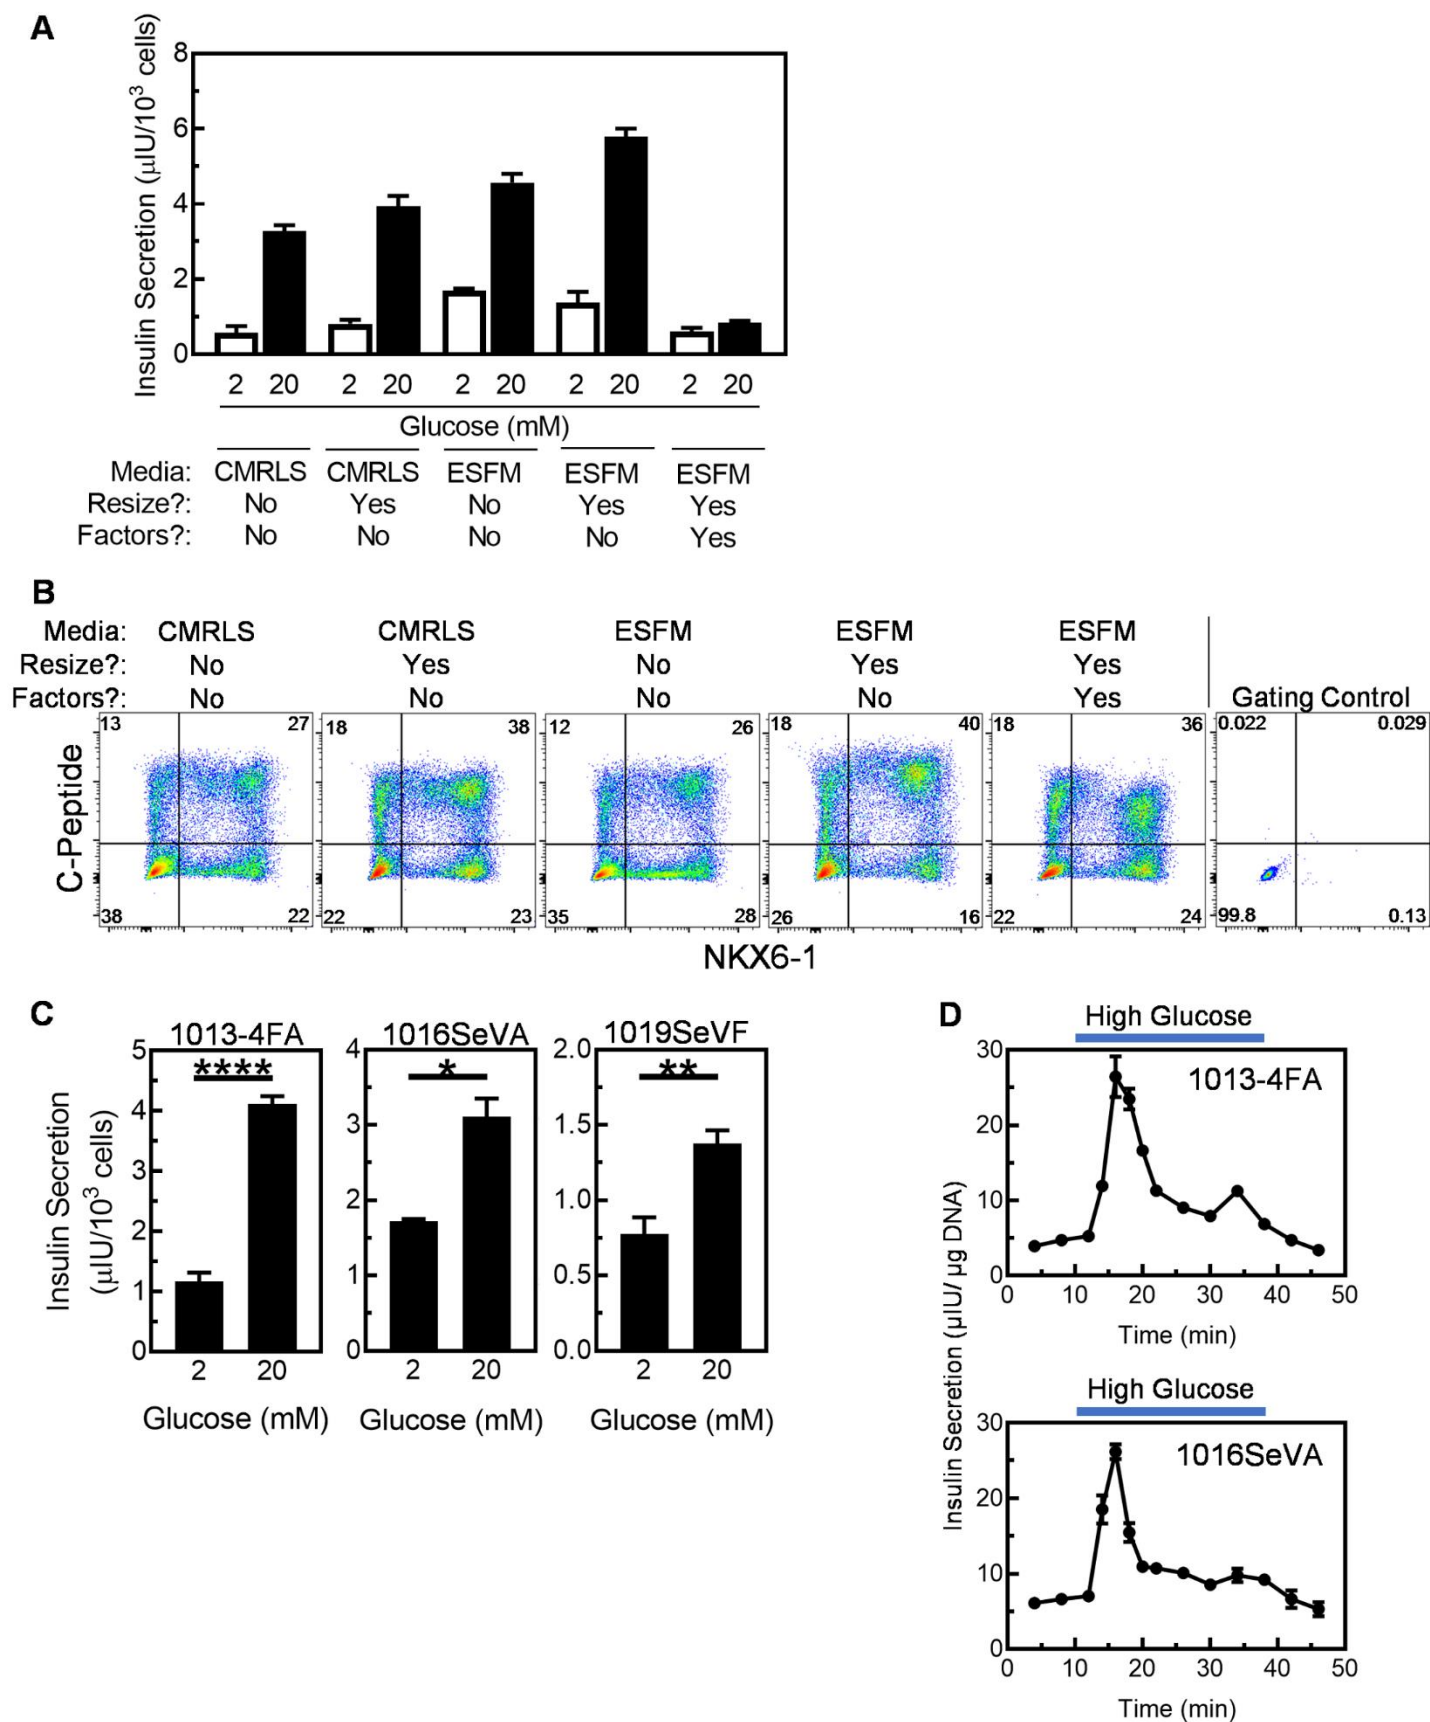

**Figure S1. Pilot data leading to our differentiation strategy and hiPSC reproduction, related to Figure 1.** (A) Human insulin secretion of Stage 6 cells generated in CMRLS or ESFM, with or without resizing, and with or without factors (Alk5i and T3) in a static GSIS assay. The combinations investigated were (1) CMRLS, no resize, no factors ( $n=3$ ), (2) CMRLS, yes resize, no factors ( $n=6$ ), (3) ESFM, no resize, no factors ( $n=3$ ), (4) ESFM, yes resize, no factors ( $n=3$ ), (5) ESFM, yes resize, yes factors ( $n=3$ ). HUES8 cell line used. (B) Flow cytometric dot plots of Stage 6 cells generated in CMRLS or ESFM, with or without resizing, and with or

without factors (Alk5i and T3) immunostained for C-peptide and NKX6-1. HUES8 cell line used. **(C)** Human insulin secretion in a static GSIS assay of three hiPSC lines ( $n=3$  each). \* $P < 0.05$ , \*\* $P < 0.01$ , and \*\*\* $P < 0.0001$  by one-sided paired  $t$ -test. **(D)** Dynamic human insulin secretion of Stage 6 cells generated with two hiPSC lines in a perfusion GSIS assay. Cells are perfused with low glucose (2 mM) except where high glucose (20 mM) is indicated ( $n=3$  for 1013-4FA and  $n=4$  for 1016SeVA).

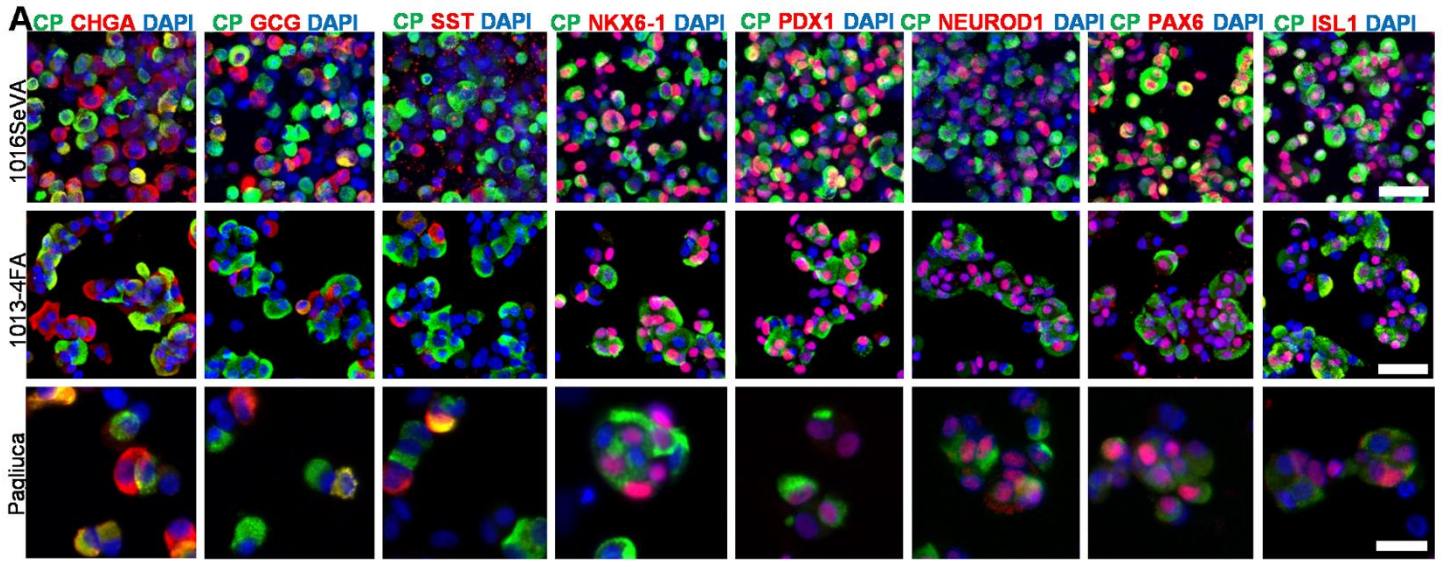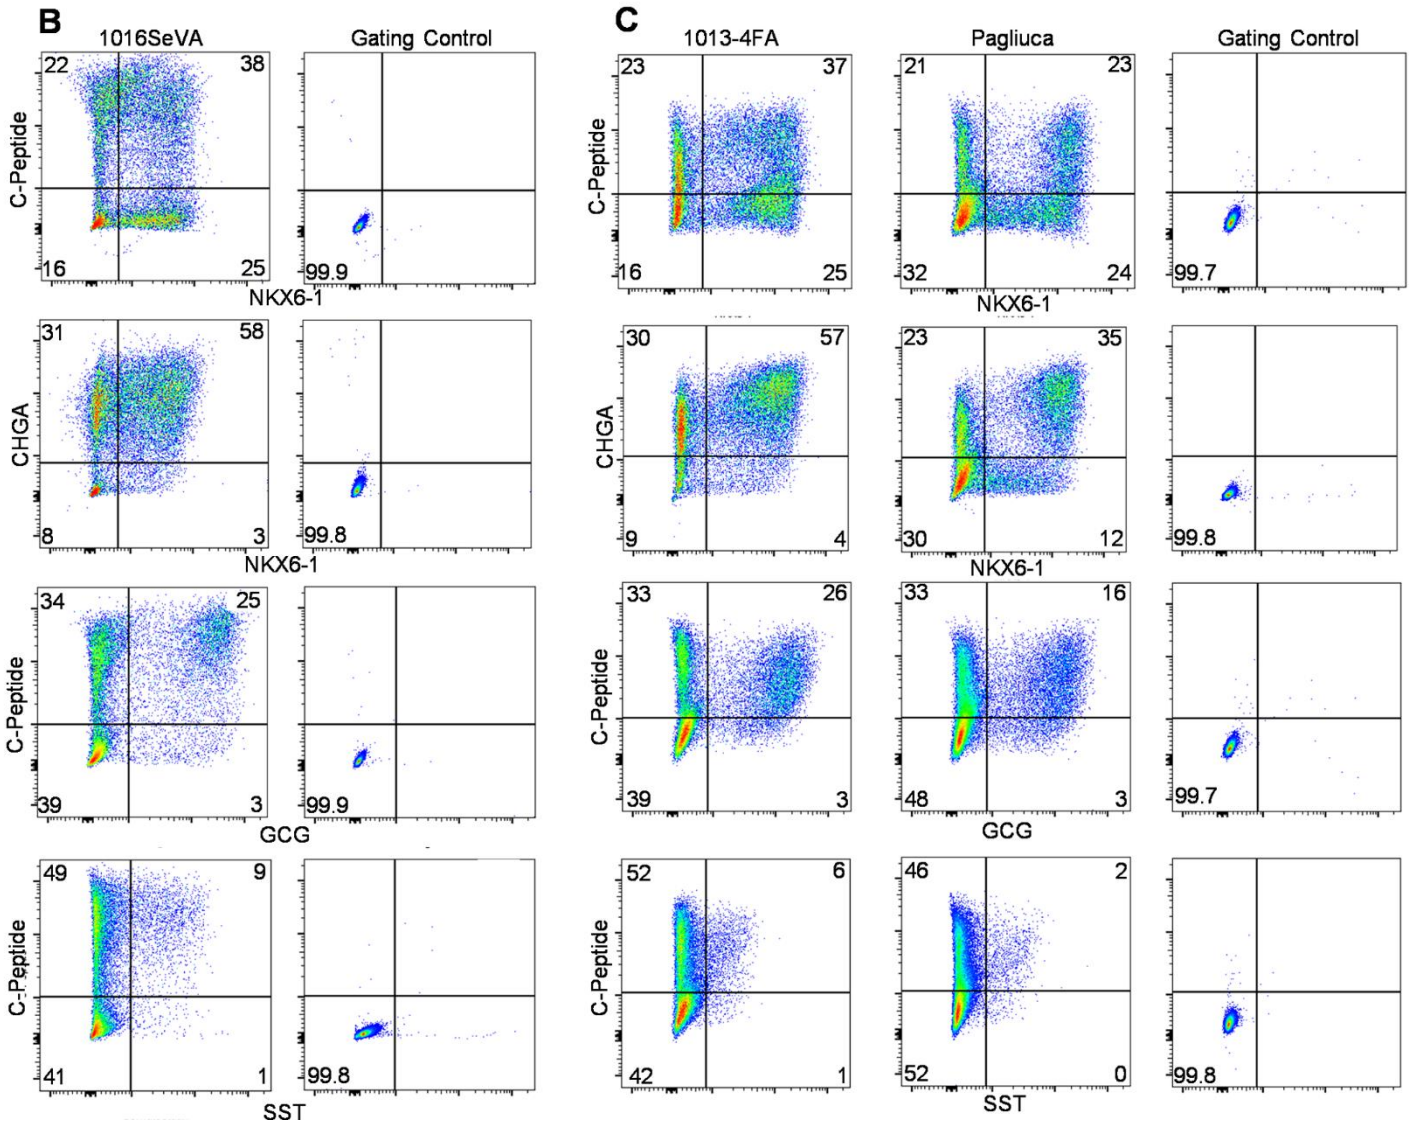

**Figure S2. Additional immunostaining data for Stage 6 cells, related to Figure 2.** (A) Immunostaining of Stage 6 clusters single-cell dispersed, plated overnight, and stained for the indicated markers. Stage 6 cells were generated from two hiPSC lines with the protocol from this paper and the HUES8 cell line with the Pagliuca protocol. Scale bar=50  $\mu$ m for 1016SeVA and 1013-4FA and 25  $\mu$ m for Pagliuca protocol. (B-C) Flow cytometric dot plots of Stage 6 cells generated from two hiPSC lines with the protocol from this paper and the HUES8 cell line with the Pagliuca protocol stained with the indicated markers.

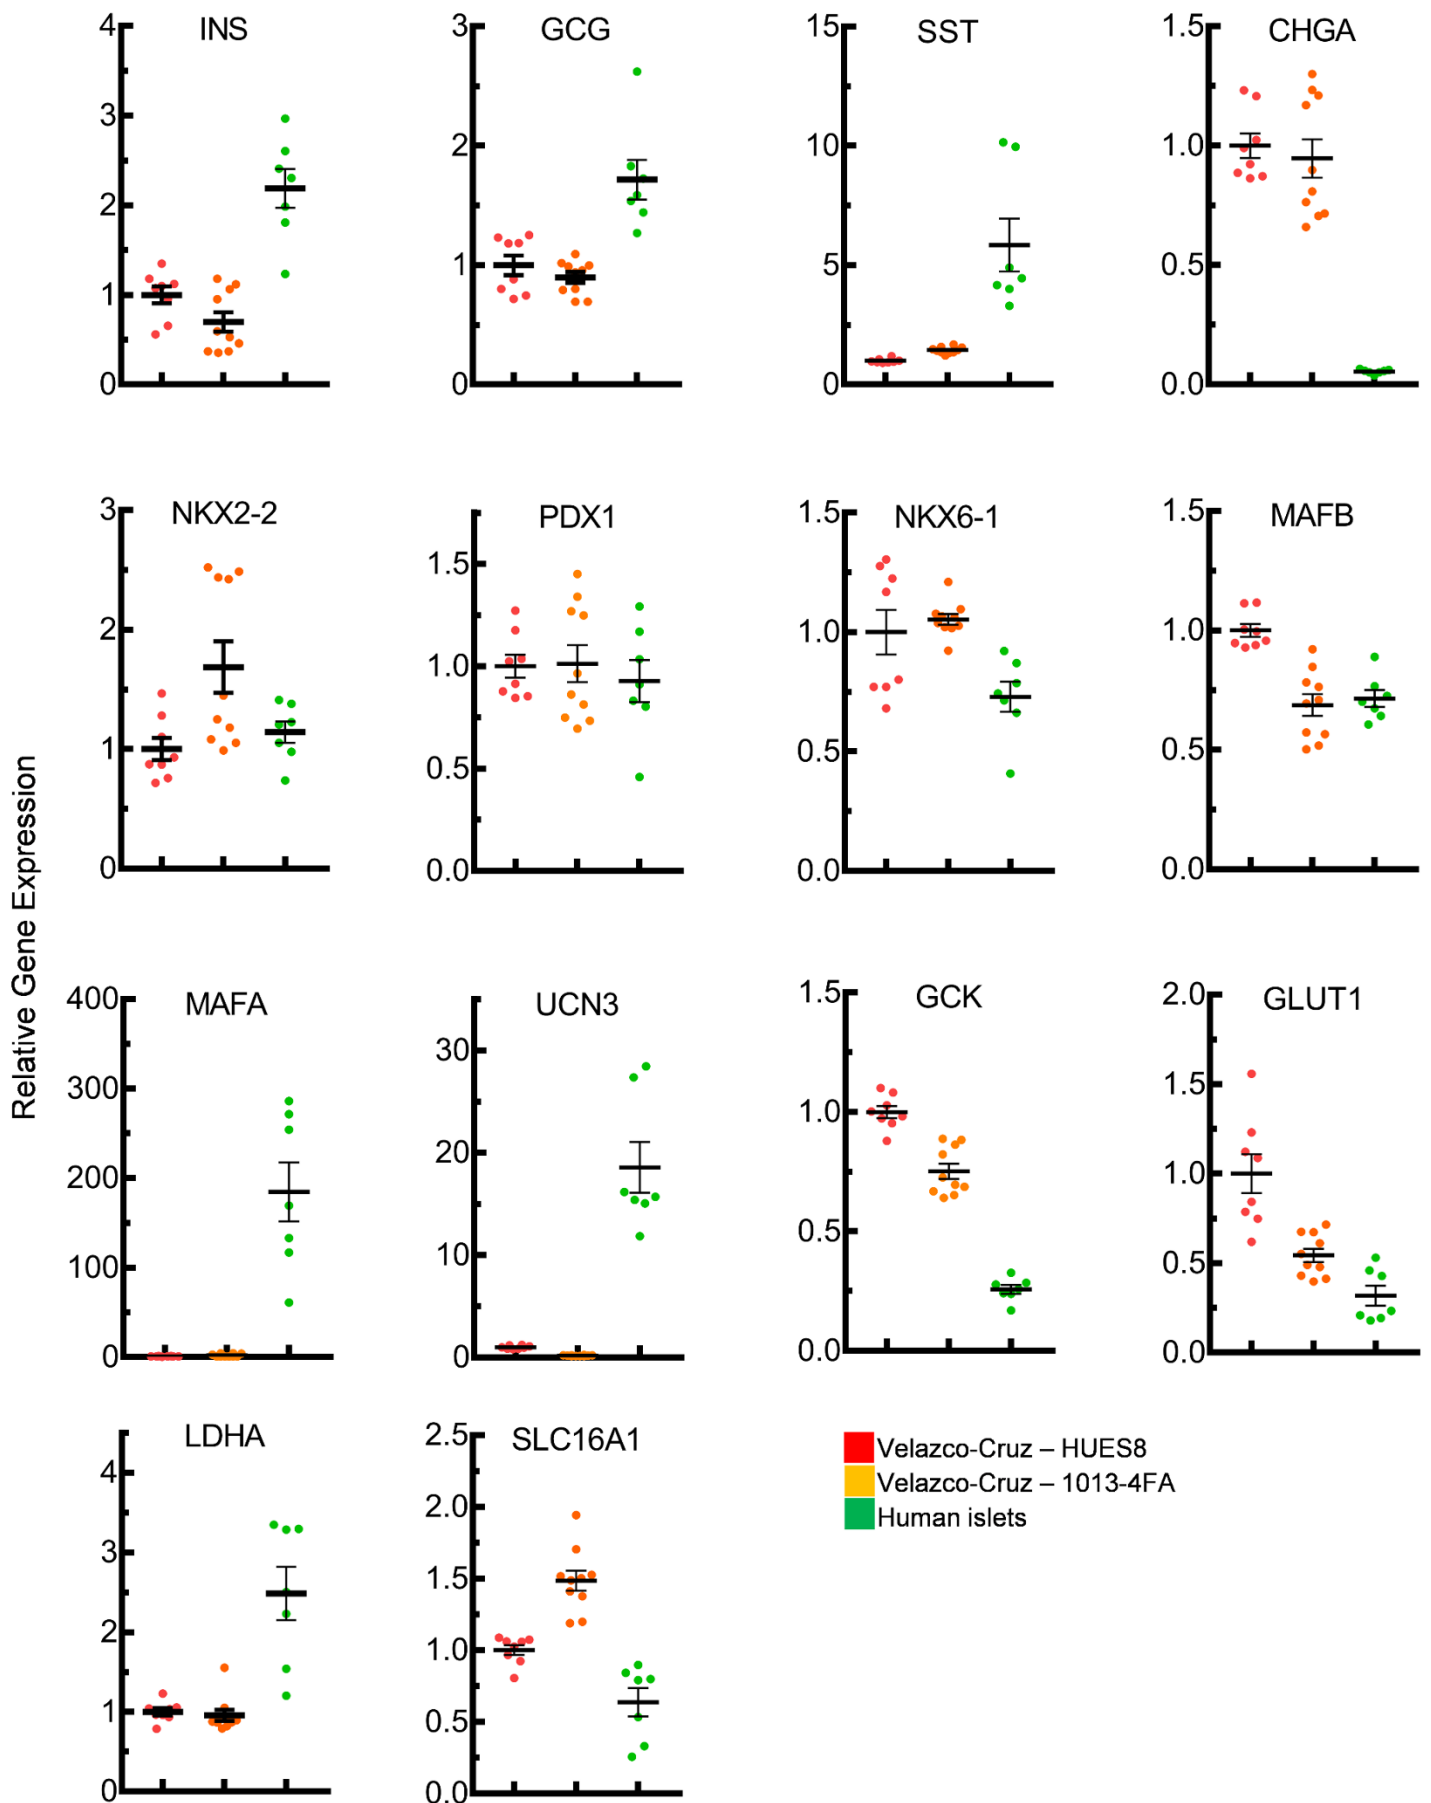

**Figure S3. Additional gene expression data for Stage 6 cells, related to Figure 2.** Gene expression data for Stage 6 cells generated with our differentiation protocol from the HUES8 ( $n=8$ ) and 1013-4FA ( $n=10$ ) lines and human islets ( $n=7$ ) measured with real-time PCR. The HUES8 and human islet plotted here is the same as from Figure 2.



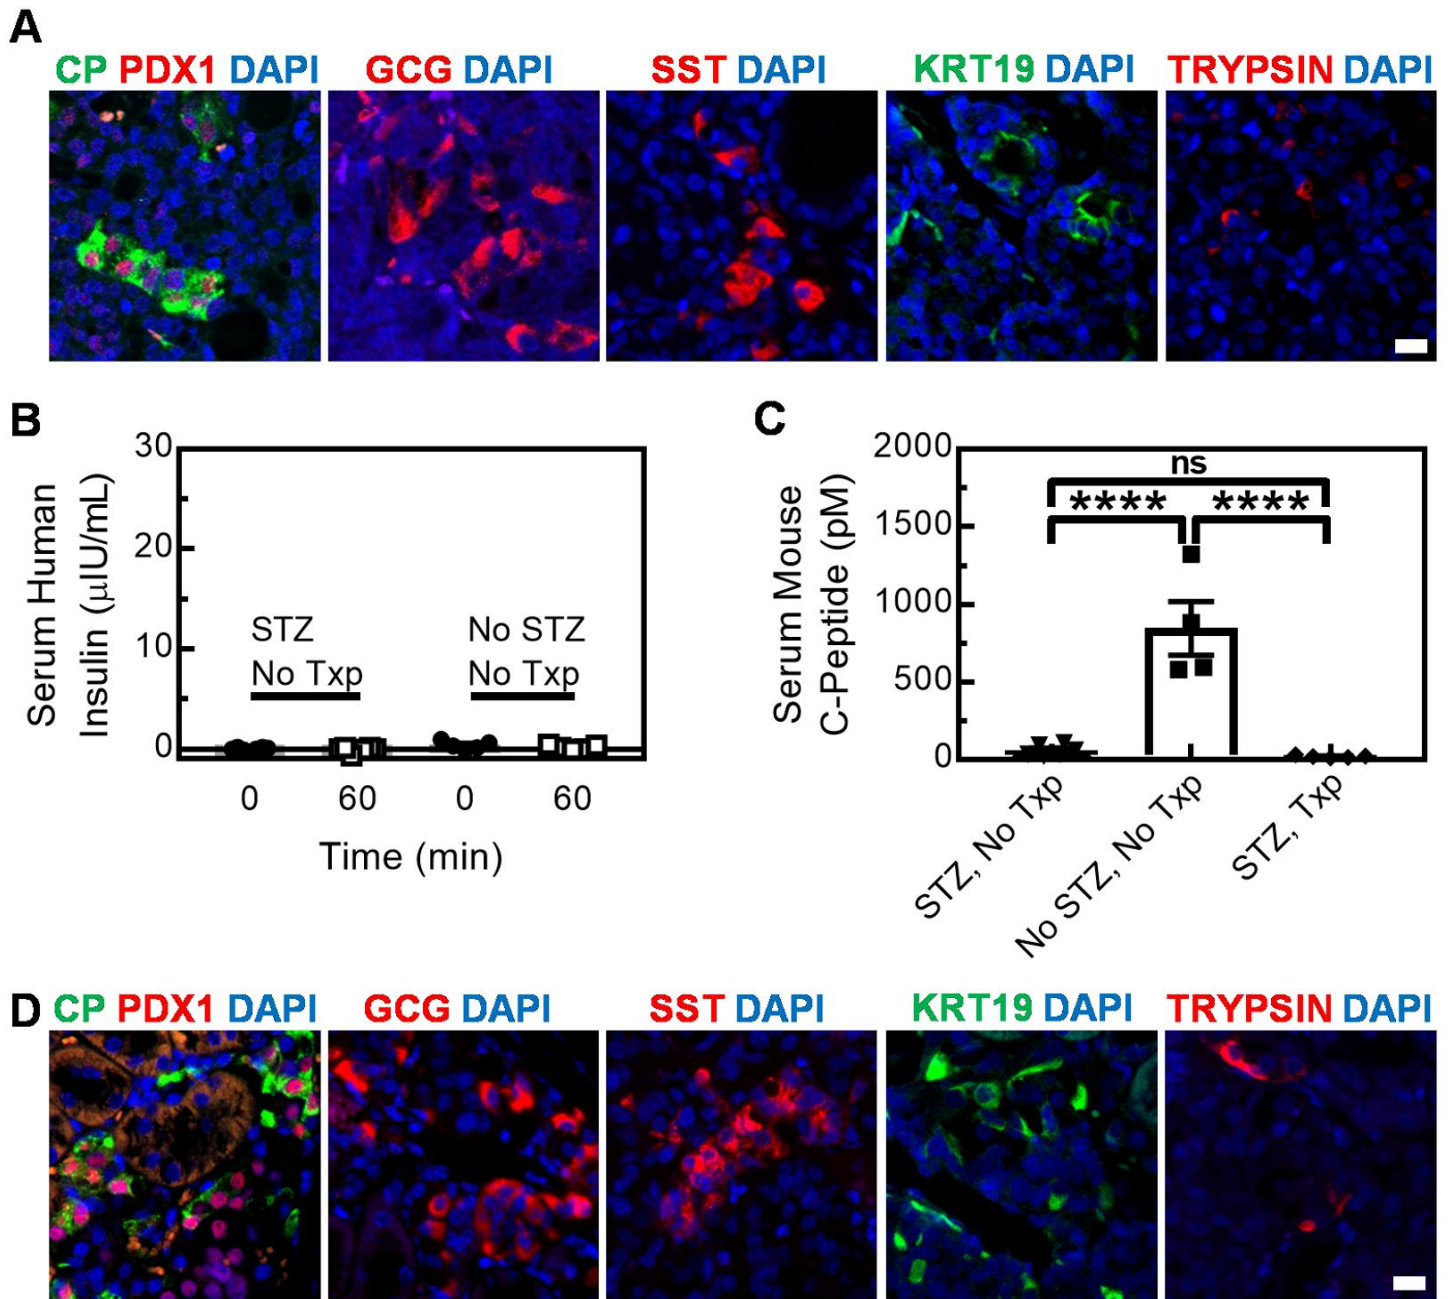

**Figure S4. Additional immunostaining, serum human insulin measurements, and mouse C-peptide measurements, related to Figure 3.** (A) Immunostaining of sectioned paraffin-embedded explanted kidneys of non-STZ-treated mice 6 months after transplantation for C-peptide (CP;  $\beta$  cell marker), PDX1 ( $\beta$  cell marker), glucagon (GCG;  $\alpha$  cell marker), somatostatin (SST;  $\delta$  cell marker), KRT19 (ductal marker), and trypsin (acinar marker). Scale bar=25  $\mu$ m. (B) Serum human insulin of STZ, No Txp mice ( $n=6$ ) and No Stz, No Txp ( $n=5$ ) fasted overnight 0 and 60 min after an injection of 2 g/kg glucose. (C) Serum mouse C-peptide of STZ, No Txp ( $n=6$ ), No STZ, No Txp ( $n=4$ ), and STZ, Txp ( $n=5$ ). \*\*\*\* $P < 0.0001$  and ns by one-way ANOVA Tukey multiple comparison test. (D) Immunostaining of sectioned paraffin-embedded explanted kidneys of STZ-treated mice 11 wk after transplantation for the indicated markers. Scale bar=25  $\mu$ m. HUES8 cell line used.



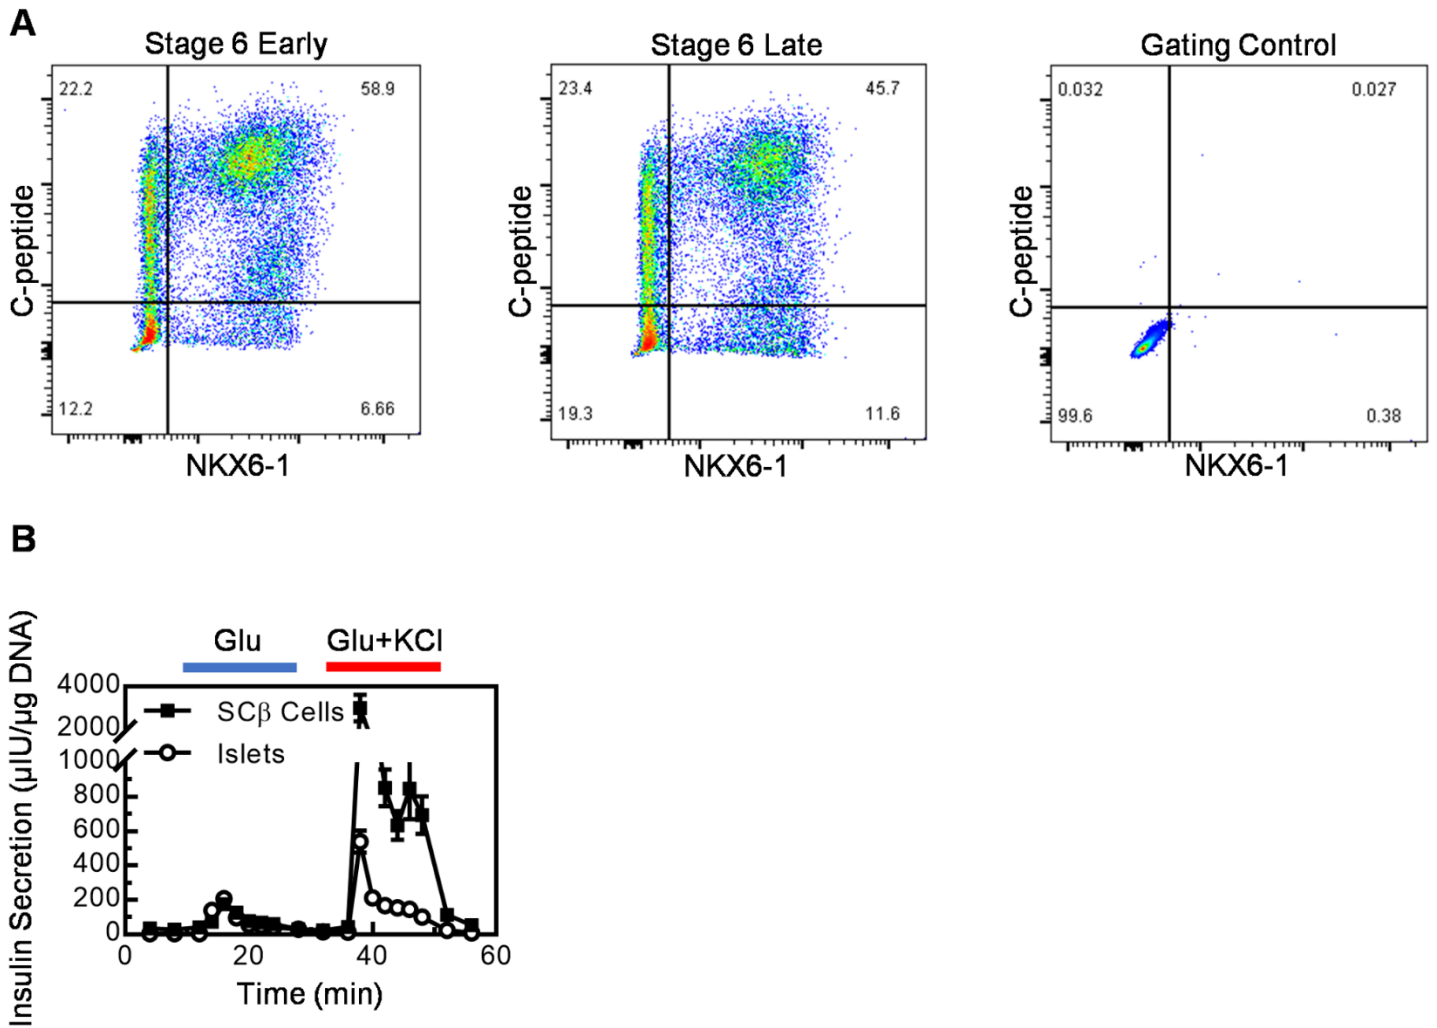

**Figure S5. Temporal flow cytometry during Stage 6 and KCl challenge of human islets, related to Figure 4.** (A) Flow cytometric dot plots of Stage 6 cells at early (9 d) and late (26 d) time points stained for C-peptide and NKX6-1. HUES8 cell line used. (B) Dynamic human insulin secretion of human islets in a perfusion GSIS assay perfused with low glucose (2 mM) except where high (20 mM) glucose is indicated (Glu), then perfused with a second challenge of high glucose with KCl where indicated (Glu+Factor) ( $n=4$ ).

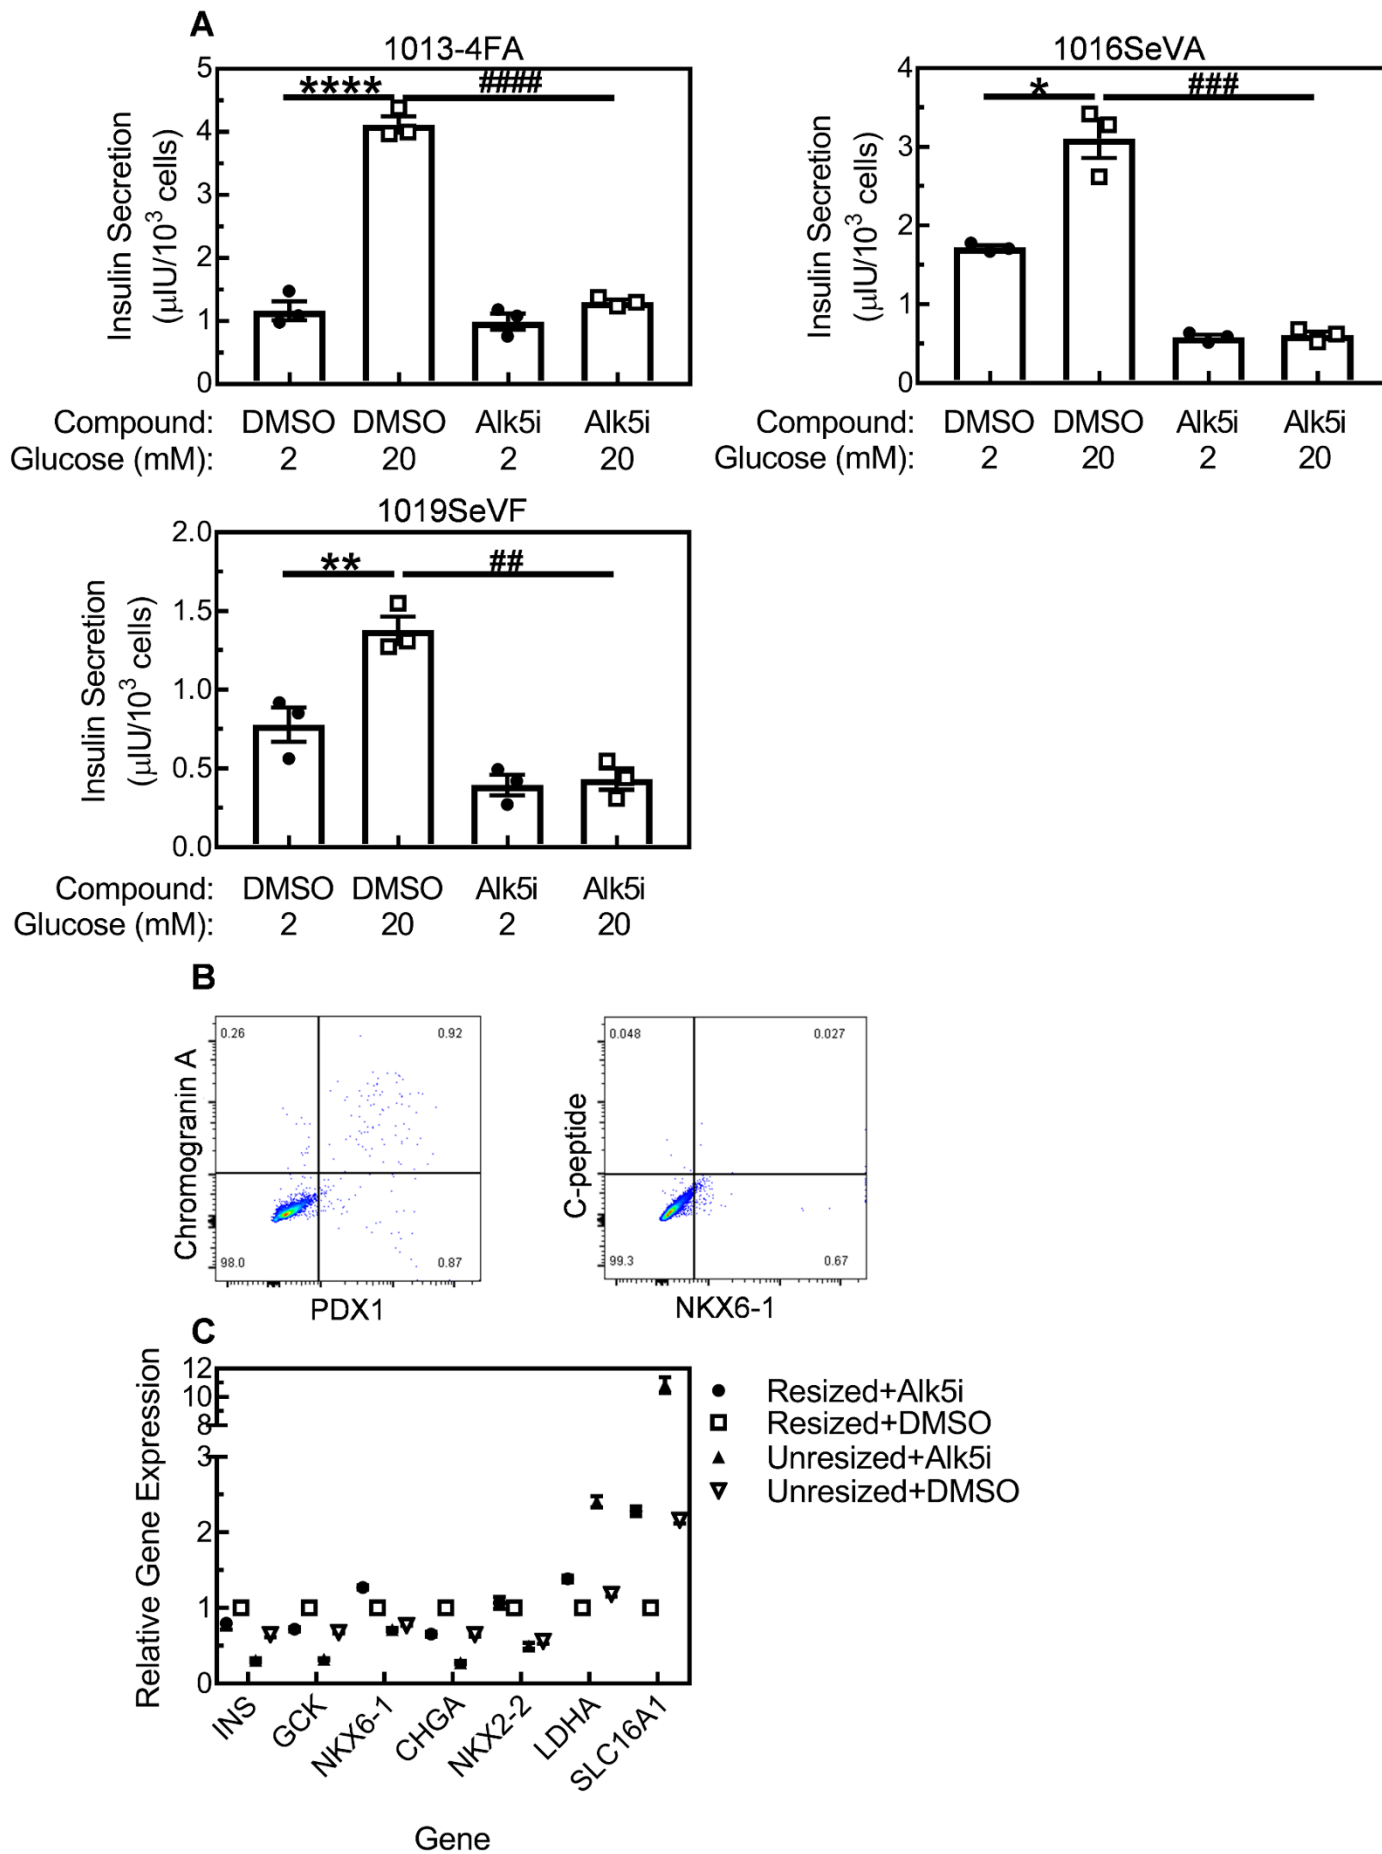

**Figure S6. Stage 6 cells generated from hiPSC undergo GSIS that is inhibited by Alk5i, flow cytometry controls, and gene expression data, related to Figure 5. (A) Human insulin secretion of Stage 6 cells generated from three hiPSC lines (1013-4FA,  $n=4$ ;**

1016SeVA,  $n=3$ ; 1019SeVF,  $n=3$ ) in static GSIS assay treated with DMSO or Alk5i. \* $P < 0.05$ , \*\* $P < 0.01$ , \*\*\*\* $P < 0.0001$  by two-way paired  $t$ -test; ## $P < 0.01$ , ### $P < 0.001$ , #### $P < 0.0001$  by two-way unpaired  $t$ -test. The control data here is the same data in Figure S1. **(B)** Flow cytometry controls for Figure 5. The C-peptide/NKX6-1 control is the same as shown in Figure 2. **(C)** Real-time PCR analysis of Stage 6 cells with or without resizing treated with Alk5i or DMSO ( $n=3$ ). Data generated with the 1013-4FA cell line.

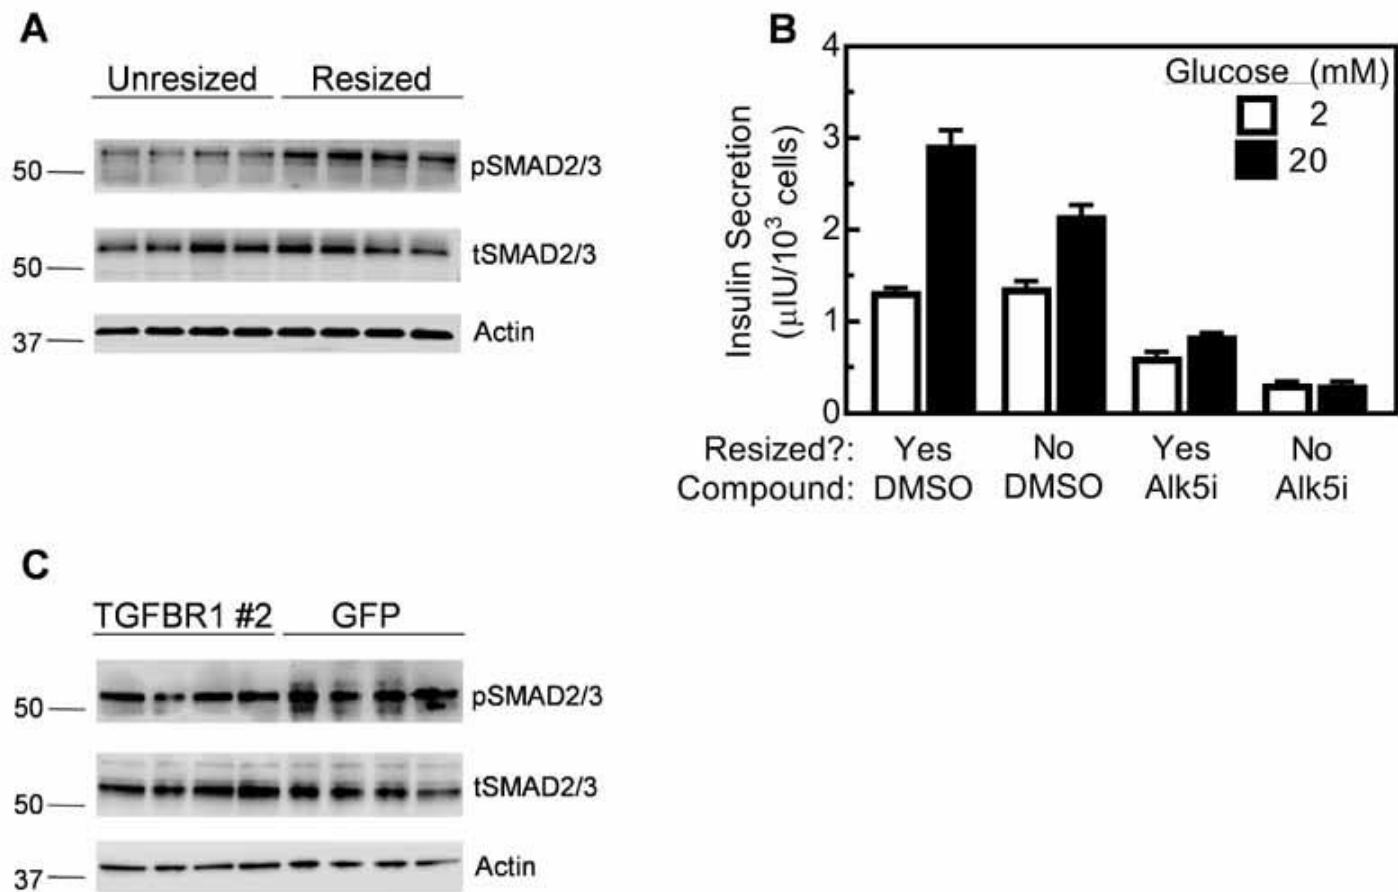

**Figure S7. Resized and unresized Stage 6 clusters have SMAD2/3 phosphorylation and reduced GSIS with Alk5i treatment and TGFBR1 #2 western blot, related to Figure 6. (A)** Western blot of Stage 6 cells with and without resizing stained for phosphorylated SMAD 2/3 (pSMAD2/3), total SMAD 2/3 (tSMAD2/3), and Actin. Data shown is from 1013-4FA. **(B)** Human insulin secretion of Stage 6 cells in static GSIS assay resized or unresized with treatment of DMSO or Alk5i. Data shown is from 1013-4FA. **(C)** Western blot of Stage 6 cells transduced with lentiviruses containing GFP or TGFBR1 #2 shRNA. Data shown is from HUES8.



## Supplemental Experimental Procedures

**Culture of Undifferentiated Cells.** The HUES8 hESC line, 1013-4FA (a non-diabetic hiPSC line referenced as ND-1 in Millman et al., 2016), 1016SeVA (a non-diabetic hiPSC line referenced as ND-2 in Millman et al. 2016), and 1019SeVF (a type 1-diabetic hiPSC line referenced as T1D-1 in Millman et al. 2016) have been previously published (Millman et al., 2016; Pagliuca et al., 2014) and were generously provided by Dr. Douglas Melton (Harvard University). Undifferentiated cells were cultured using mTeSR1 (StemCell Technologies; 05850) in 30-mL spinner flasks (REPROCELL; ABBWVS03A) on a rotator stir plate (Chemglass) spinning at 60 RPM in a humidified 5% CO<sub>2</sub> 37 °C incubator. Cells were passaged every 3-4 days by single cell dispersion using Accutase (StemCell Technologies; 07920), viable cells counted with Vi-Cell XR (Beckman Coulter), and seeded at 6 x 10<sup>5</sup> cells/mL in mTeSR1 + 10 μM Y27632 (Abcam; ab120129).

**Cell Line Differentiation.** To initiate differentiation, undifferentiated cells were single-cell dispersed using Accutase and seeded at 6 x 10<sup>5</sup> cells/mL in mTeSR1 + 10 μM Y27632 in a 30-ml spinner flask. Cells were then cultured for 72 hr in mTeSR1 and then cultured in the following differentiation media. **Stage 1** (3 days): S1 media + 100 ng/ml Activin A (R&D Systems; 338-AC) + 3 μM Chir99021 (Stemgent; 04-0004-10) for 1 day. S1 media + 100 ng/ml Activin A for 2 days. **Stage 2** (3 days): S2 media + 50 ng/ml KGF (Peptide; AF-100-19). **Stage 3** (1 day): S3 media + 50 ng/ml KGF + 200 nM LDN193189 (Reprocell; 040074) + 500 nM PdBU (MilliporeSigma; 524390) + 2 μM Retinoic Acid (MilliporeSigma; R2625) + 0.25 μM Sant1 (MilliporeSigma; S4572) + 10 μM Y27632. **Stage 4** (5 days): S4 media + 5 ng/ml Activin A + 50 ng/ml KGF + 0.1 μM Retinoic Acid + 0.25 μM SANT1 + 10 μM Y27632. **Stage 5** (7 days): S5 media + 10 μM ALK5i II (Enzo Life Sciences; ALX-270-445-M005) + 20 ng/mL Betacellulin (R&D Systems; 261-CE-050) + 0.1 μM Retinoic Acid + 0.25 μM SANT1 + 1 μM T3 (Biosciences; 64245) + 1 μM XXI (MilliporeSigma; 595790). **Stage 6** (7-35 days): ESFM.

Differentiation media formulations used were the following. **S1 media:** 500mL MCDB 131 (Cellgro; 15-100-CV) supplemented with 0.22 g glucose (MilliporeSigma; G7528), 1.23 g sodium bicarbonate (MilliporeSigma; S3817), 10 g bovine serum albumin (BSA) (Proliant; 68700), 10 μL ITS-X (Invitrogen; 51500056), 5 mL GlutaMAX (Invitrogen; 35050079), 22 mg vitamin C (MilliporeSigma; A4544), and 5 mL penicillin/streptomycin (P/S) solution (Cellgro; 30-002-CI). **S2 media:** 500mL MCDB 131 supplemented with 0.22 g glucose, 0.615 g sodium bicarbonate, 10 g BSA, 10 μL ITS-X, 5 mL GlutaMAX, 22 mg vitamin C, and 5 mL P/S. **S3 media:** 500mL MCDB 131 supplemented with 0.22 g glucose, 0.615 g sodium bicarbonate, 10 g BSA, 2.5 mL ITS-X, 5 mL GlutaMAX, 22 mg vitamin C, and 5 mL P/S. **S5 media:** 500mL MCDB 131 supplemented with 1.8 g glucose, 0.877 g sodium bicarbonate, 10 g BSA, 2.5 mL ITS-X, 5 mL GlutaMAX, 22 mg vitamin C, 5 mL P/S, and 5 mg heparin (MilliporeSigma; A4544). **ESFM:** 500mL MCDB 131 supplemented with 0.23 g glucose, 10.5 g BSA, 5.2 mL GlutaMAX, 5.2 mL P/S, 5 mg heparin, 5.2 mL MEM nonessential amino acids (Corning; 20-025-CI), 84 μg ZnSO<sub>4</sub> (MilliporeSigma; 10883), 523 μL Trace Elements A (Corning; 25-021-CI), and 523 μL Trace Elements B (Corning; 25-022-CI). Cells were sometimes cultured with 0.01% DMSO. Cells were resized the first day of Stage 6 by incubating in Gentle Cell Dissociation Reagent (StemCell Technologies; 07174) for 8 min, washed with ESFM, passed through a 100 μm nylon cell strainer (Corning; 431752), and cultured in ESFM in 6-well plates on an Orbi-Shaker (Benchmark) set at 100 RPM. Assessment assays were performed between 10-16 days of stage 6 unless otherwise stated. Human islets were acquired from Prodo Labs for comparison. A subset of Stage 6 experiments were performed without cluster resizing, with Alk5i and T3, with Alk5i, and/or CMRL 1066 Supplemented (CMRLS) (Mediatech; 99-603-CV) + 10% fetal bovine serum (FBS) (HyClone; 16777) + 1% P/S rather than ESFM, as indicated. To perform the Pagliuca protocol, the protocol outlined in Pagliuca, Millman, Gürtler et al. 2014 was followed in 30-mL spinner flasks.

**Light Microscopy.** Light Microscopy images were taken of unstained or stained with 2.5 μg/mL DTZ (MilliporeSigma; 194832) cell clusters using an inverted light microscope (Leica DMi1).

**Immunostaining.** To immunostain *in vitro* cell clusters or *ex vivo* transplanted grafts within mouse kidneys, samples were fixed with 4% paraformaldehyde (Electron Microscopy Science; 15714) overnight at 4 °C. After fixation, cell clusters were embedded in Histogel (Thermo Scientific; hg-4000-012). Embedded cell clusters and grafts were placed in 70% ethanol and submitted for paraffin-embedding and sectioning to the Division of Comparative Medicine (DCM) Research Animal Diagnostic Laboratory Core at Washington University. Paraffin was removed using Histoclear (Thermo Scientific; C78-2-G), samples rehydrated, and antigens retrieved with 0.05 M EDTA (Ambion; AM9261) in a pressure cooker (Proteogenix; 2100 Retriever). Samples were blocked and permeabilized for 30-min with staining buffer (5% donkey serum (Jackson ImmunoResearch; 017-000-121) and 0.1% Triton-X 100 (Acros Organics; 327371000) in PBS), stained overnight with primary antibodies at 4 °C, stained for 2 hr with secondary antibodies at 4 °C, and treated with mounting solution DAPI Fluoromount-G (SouthernBiotech; 0100-20). To immunostain plated cells, clusters were single-cell dispersed using TrypLE Express (Fisher; 12604039), plated down onto Matrigel (Fisher; 356230)-coated plates, cultured in ESFM for 16 hr, and fixed for 30 min with 4% paraformaldehyde at RT. Fixed cells were blocked and permeabilized with staining buffer for 45 min at RT, stained overnight with primary antibodies at 4 °C, stained for 2 hr with secondary antibodies at RT, and stained with DAPI for 5 min. Imaging was performed on a Nikon A1Rsi confocal microscope or Leica DMI4000 fluorescence microscope.

Primary antibody solutions were made in staining buffer with the following antibodies at 1:300 dilution unless otherwise noted: rat-anti-C-peptide (DSHB; GN-ID4-S), 1:100 mouse-anti-nkx6.1 (DSHB, F55A12-S), mouse-anti-glucagon (ABCAM; ab82270), goat-anti-pdx1 (R&D Systems; AF2419), rabbit-anti-somatostatin (ABCAM; ab64053), mouse-anti-pax6 (BDBiosciences; 561462), rabbit-anti-chromogranin a (ABCAM; ab15160), goat-anti-neurod1 (R&D Systems; AF2746), mouse-anti -Islet1 (DSHB, 40.2d6-s), 1:100

mouse-anti-cytokeratin 19 (Dako; MO888), undiluted rabbit-anti-glucagon (Cell Marque; 259A-18), 1:100 sheep-anti-trypsin (R&D Systems; AF3586). Secondary antibody solutions were made in staining buffer with the following antibodies at 1:300 dilution: anti-rat-alexa fluor 488 (Invitrogen; a21208), anti-mouse-alexa fluor 594 (Invitrogen; a21203), anti-rabbit-alexa fluor 594 (Invitrogen; a21207), anti-goat-alexa fluor 594 (Invitrogen; a11058).

**Static GSIS.** Assays were performed by collecting ~20-30 stage 6 clusters or cadaveric human islets, washed twice with KRB buffer (128 mM NaCl, 5 mM KCl, 2.7 mM CaCl<sub>2</sub>, 1.2 mM MgSO<sub>4</sub>, 1 mM Na<sub>2</sub>HPO<sub>4</sub>, 1.2 mM KH<sub>2</sub>PO<sub>4</sub>, 5 mM NaHCO<sub>3</sub>, 10 mM HEPES (Gibco; 15630-080), and 0.1% BSA), resuspended in 2 mM glucose KRB, and placed into transwells (Corning; 431752) in 24-well plates. Clusters were incubated at 2 mM glucose KRB for a 1 hr equilibration. The transwell was then drained and transferred into a new 2 mM glucose KRB well, discarding the old KRB solution. Clusters were again incubated for 1 hr at low glucose and then the transwell is drained and transferred into a new 2, 5.6, 11.1, or 20 mM glucose KRB well, retaining the old 2 mM glucose KRB. Clusters were then incubated for 1 hr at high glucose and then the transwell was drained and the old glucose KRB was retained. The retained KRB was run with the Human Insulin Elisa (ALPCO; 80-INSHU-E10.1) to quantify insulin secretion. The cells were single-cell dispersed by TrypLE treatment, counted on a Vi-Cell XR, and viable cell counts used to normalize insulin secretion.

**Dynamic Glucose-Stimulated Insulin Secretion.** A perfusion system was assembled as has been previously reported (Bentsi-Barnes et al., 2011). Our system used a high precision 8-channel dispenser pump (ISMATEC; ISM931C) in conjunction with 0.015" inlet and outlet two-stop tubing (ISMATEC; 070602-04i-ND) connected to 275- $\mu$ l cell chamber (BioRep; Peri-Chamber) and dispensing nozzle (BioRep; PERI-NOZZLE) using 0.04" connection tubing (BioRep; Peri-TUB-040). Solutions, tubing, and cells were maintained at 37 °C in a water bath. Stage 6 clusters and cadaveric human islets were washed with KRB twice and resuspended in 2 mM glucose KRB. Cells were then loaded onto a Biorep perfusion chamber sandwiched between two layers of Bio-Gel P-4 polyacrylamide beads (Bio-Rad; 150-4124). Cells were perfused with 2 mM glucose KRB for 90 min prior to sample collection for equilibration. For single high glucose challenges, sample collection was started with cells exposed to 2 mM glucose KRB for 12 min, followed by 24 min of 20 mM glucose KRB, and back to 2 mM glucose KRB for an additional 12 min. For multiple secretagogue challenges, sample collection was started with cells exposed to 2 mM glucose KRB for 6 min, followed by 12 min of 20 mM glucose KRB, 6 min 2 mM glucose KRB, 12 min of 20 mM glucose KRB plus treatment, and finally 6 min of 2 mM glucose KRB. Treatments with multiple secretagogues were as follows: 20 mM glucose only, 10 nM Extendin-4 (MilliporeSigma; E7144), 100  $\mu$ M IBMX (MilliporeSigma; I5879), 300  $\mu$ M Tolbutamide (MilliporeSigma; T0891), 20 mM L-Arginine (MilliporeSigma; A5006), and 30 mM KCL (Thermo Fisher; BP366500). Effluent was collected at a 100  $\mu$ l/min flow rate with 2-4 min collection points. After sample collection, clusters were collected and lysed in 10 mM Tris (MilliporeSigma; T6066), 1 mM EDTA, and 0.2% Triton-X 100 solution and DNA was quantified using Quant-iT Picogreen dsDNA assay kit (Invitrogen; P7589). Insulin secretion was quantified using the Human Insulin Elisa kit.

**Flow Cytometry.** Clusters were single-cell dispersed with TrypLE, fixed with 4% paraformaldehyde for 30 min at 4 °C, blocked and permeabilized with staining buffer for 30 min at 4 °C, incubated with primary antibodies in staining buffer overnight at 4 °C, incubated with secondary antibodies in staining buffer for 2 hr at 4 °C, resuspended in staining buffer, and analyzed on an LSRII (BD Biosciences) or X-20 (BD Biosciences). Dot plots and percentages were generated using FlowJo. All antibodies were used at 1:300 dilution except where noted. The antibodies used were: rat-anti-C-peptide (DSHB; GN-ID4-S), mouse-anti -nkx6.1 (1:100; DSHB, F55A12-S), mouse-anti -glucagon (ABCAM; ab82270), rabbit-anti-somatostatin (ABCAM; ab64053), rabbit-anti-chromogranin A (1:1000; ABCAM; ab15160), goat-anti-pdx1 (R&D Systems; AF2419), anti-rat-alexa fluor 488 (Invitrogen; a21208), anti-mouse-alexa fluor 647 (Invitrogen; a31571), anti-rabbit-alexa fluor 647 (Invitrogen; a31573), anti-goat-alexa fluor 647 (Invitrogen; a21447), anti-rabbit-alexa fluor 488 (Invitrogen; a21206).

**Real-Time PCR.** RNA was extracted using the RNeasy Mini Kit (Qiagen; 74016) with DNase treatment (Qiagen; 79254), and cDNA was synthesized using High Capacity cDNA Reverse Transcriptase Kit (Applied Biosystems; 4368814). Real-time PCR reactions were performed in PowerUp SYBR Green Master Mix (Applied Biosystems; A25741) on a StepOnePlus (Applied Biosystems) and analyzed using  $\Delta\Delta$ Ct methodology. TBP was used as a normalization gene. Primer sequences used were (gene, forward primer, reverse primer): INS, CAATGCCACGCTTCTGC, TTCTACACACCCAAGACCCG; PDX1, CGTCCGCTTGTCTCTCCTC, CCTTTCCCATGGATGAAGTC; GCG, AGCTGCCTTGTACCAGCATT, TGCTCTCTTTCACCTGCTCT; SST, TGGGTTTCAGACAGCAGCTC, CCCAGACTCCGTCAGTTTCT; TBP, GCCATAAGGCATCATTGGAC, AACAACAGCCTGCCACCTTA; NKX6-1, CCGAGTCCTGCTTCTTCTTG, ATTCGTTGGGGATGACAGAG; CHGA, TGACCTCAACGATGCATTTC, CTGTCCTGGCTCTTCTGCTC; NEUROD1, ATGCCCGGAACCTTTTCTTT, CATAGAGAACGTGGCAGCAA; NGN3, CTTCGTCTTCCGAGGCTCT, CTATTCTTTTGCGCCGGTAG; NKX2-2, GGAGCTTGAGTCCTGAGGG, TCTACGACAGCAGCGACAAC; TGFBR1, CGACGGCGTTACAGTGTCTT, CCCATCTGTACACAAGTAAA; GUSB, CGTCCCACCTAGAATCTGCT, TTGCTCACAAGGTCACAGG; UCN3, GGAGGGAAAGTCCACTCTCG, TGTAGAACTTGTGGGGGAGG; MAFA, GAGAGCGAGAAGTGCCAACT, TTCTCCTTGTACAGGTCCTCC; GCK, ATGCTGGACGACAGAGCC, CCTTCTTCAGGTCTCTCTCC; MAFB, CATAGAGAACGTGGCAGCAA, ATGCCCGGAACCTTTTCTTT; LDHA, GGCCTGTGCCATCAGTATCT, GGAGATCCATCATCTCTCCC; GLUT1, ATGGAGCCCAGCAGCAA, GGCATTGATGACTCCAGTGTT; SLC16A1, CACTTAAAATGCCACCAGCA, AGAGAAGCCGATGGAAATGA

**Transplantation Studies.** All animal work was performed in accordance to Washington University International Animal Care and Use Committee regulations. Mice were randomly assigned to transplantation or no transplantation groups, mouse number was chosen to be sufficient to allow for statistical significance based on prior studies (Millman et al., 2016; Pagliuca et al., 2014; Song and Millman, 2016). All procedures were performed by unblinded individuals. Two mouse cohorts were used in this study. The first consisted of non-STZ treated SCID/Beige male mice 50-56 days of age purchased from Charles River. The second consisted of STZ-treated and control-treated NOD/SCID male mice 6 weeks of age purchased from Jackson Laboratories. Mice were anaesthetized with isoflurane and injected with  $\sim 5 \times 10^6$  Stage 6 cells or saline (no transplant control) under the kidney capsule, similar to as previously reported (Millman et al., 2016; Pagliuca et al., 2014). Mice were monitored up to 6 months after transplantation by performing glucose-tolerance tests and *in vivo* GSIS. Mice were fasted 16 hr and then injected with 2 g/kg of glucose. Blood was collected via tail bleed. Blood glucose levels were measured with a handheld glucometer (Contour Blood Glucose Monitoring System Model 9545C; Bayer). Human insulin was determined by collecting blood and separating serum in microvettes (Sarstedt; 16.443.100) and quantifying using the Human Ultrasensitive Insulin ELISA (ALPCO Diagnostics; 80-ENSHUU-E01.1). Serum mouse C-peptide concentration was determined by collecting blood from fed mice, separating serum in microvettes, and quantifying using a Mouse C-peptide ELISA (ALPCO Diagnostics; 80-CPTMS-E01).

**Insulin and Proinsulin Content.** Stage 6 clusters were washed thoroughly with PBS, immersed in a solution of 1.5% HCl and 70% ethanol, kept at  $-20^\circ\text{C}$  for 24 hr, retrieved and vortexed vigorously, returned and kept at  $-20^\circ\text{C}$  for an additional 24 hr, retrieved and vortexed vigorously, and centrifuged at 2100 RCF for 15 min. The supernatant was collected and neutralized with an equal volume of 1 M TRIS (pH 7.5). Human insulin and pro-insulin content were quantified using Human Insulin Elisa and Proinsulin Elisa (Merckodia; 10-1118-01) respectively. Samples were normalized to viable cell counts made using the Vi-Cell XR.

**Western Blot.** Protein was extracted from cell clusters after washing with PBS by placing in western blot lysis buffer consisting 50 mM HEPES, 140 mM NaCl (MilliporeSigma; 7647-14-5), 1 mM EDTA (MilliporeSigma; 1233508), 1% Triton X-100, 0.1% Na-deoxycholate (MilliporeSigma; D6750), 0.1% SDS (ThermoScientific; 24730020), 1mM  $\text{Na}_3\text{VO}_4$  (MilliporeSigma; 450243), 10 mM NaF (MilliporeSigma; S7920), and 1% Protease Inhibitor Cocktail (MilliporeSigma; p8340), incubating on a shaker for 15 min at  $4^\circ\text{C}$ , and centrifuging at 10000 RCF for 10 min at  $4^\circ\text{C}$ . Protein amount was quantified with the Pierce BCA Protein Assay (Thermo Scientific; 23228). Protein (30  $\mu\text{g}$ ) was loaded onto a 4-20% gradient polyacrylamide gel (Invitrogen; SP04200BOX), resolved by electrophoresis, and transferred onto a 0.45  $\mu\text{m}$  nitrocellulose membrane (BioRad; 1620115). The nitrocellulose membrane was blocked with Blotting Grade Blocker (BioRad; 170-6404) and incubated with rabbit-anti-phospho-SMAD2/3 1:1000 (Cell Signaling Technologies; 8828) and rabbit-anti-Actin 1:1000 (Santa Cruz Biotechnology; SC1616) antibodies in blocker overnight at  $4^\circ\text{C}$ . Membrane was washed and stained with rabbit secondary antibody 1:2500 (Jackson Immuno Research Laboratories; 211-032-171) in blocker for 2 hr at  $4^\circ\text{C}$  and developed using SuperSignal West Femto (Thermo Scientific; 34096). Images were taken on an Odyssey FC (Li-COR). After imaging, the nitrocellulose membrane was stripped using Restore Western Blot Stripping Buffer (Thermo Scientific; 21059), incubated with rabbit-anti-SMAD2/3 (Cell Signaling Technologies; 8685) antibody overnight at  $4^\circ\text{C}$ , washed and stained with rabbit secondary antibody 1:2500 in blocker for 2 hr at RT, developed using SuperSignal West Femto, and imaged using the Odyssey FC.

**Lentivirus.** pLKO.1 TRC plasmids containing shRNA sequences were received from the RNAi Core at the Washington University containing the following sequences: shRNA GFP, GCGCGATCACATGGTCCTGCT; shRNA TGFBR1 #1, GATCATGATTACTGTCGATAA; shRNA TGFBR1 #2, GCAGGATTCTTTAGGCTTTAT. Lentivirus particles were generated and titered by the Hope Center Viral Vectors Core at Washington University using pMD-Lgp/RRE and pCMV-G, and RSV-REV packaging plasmids to contain shRNA. Stage 6 Day 1 cells were single cell dispersed using TrypLE, and 3 million cells were seeded in 4 mL ESFM lentivirus particles at MOI 3-5 on the shaker. Transduced cells were washed with fresh ESFM 16 hr post transduction. RNA extraction and static GSIS was performed on stage 6 day 13.
